1 **Conditional gene expression reveals stage-specific functions of the**  
2 **unfolded protein response in the *Ustilago maydis*/maize**  
3 **pathosystem**

4 Lara Schmitz<sup>1,3</sup>, James W. Kronstad<sup>2,3</sup>, Kai Heime<sup>1,3\*</sup>

5

6 <sup>1</sup>Institute for Microbiology and Genetics, Department of Molecular Microbiology and  
7 Genetics, Göttingen Center for Molecular Biosciences (GZMB), University of Göttingen,  
8 Grisebachstr. 8, D-37077 Göttingen, Germany

9 <sup>2</sup>Michael Smith Laboratories, Department of Microbiology and Immunology, University of  
10 British Columbia, Vancouver, BC, Canada V6T 1Z4

11 <sup>3</sup>International Research Training Group 2172 PRoTECT, Göttingen-Vancouver

12

13 \* Corresponding author

14 Email: [kheimel@gwdg.de](mailto:kheimel@gwdg.de)

15

16

17 **Running head:** Conditional gene expression in *Ustilago maydis*

18 **Keywords:** *Ustilago*, conditional gene expression, unfolded protein response, pathogenicity

19 **Word count (excluding references):** 6686 words

20 **Accession numbers (NCBI):** *UMAG\_12184*, XP\_011388913.1; *UMAG\_03597*,

21 XP\_011390022.1; *cib1*, *UMAG\_11782*, XP\_011390112.1; *mig2\_1*, *UMAG\_06178*,

22 XP\_011392548.1; *mig1*, *UMAG\_03223*, XP\_011389652.1; *pit1*, *UMAG\_01374*,

23 XP\_011387263.1, *pit2*, *UMAG\_01375*, XP\_011387264.1; *PR1* (Zm.15280.1), BM351351;

24 *PR3* (Zm.1085.1), BM339391; *PR5* (Zm.6659.1), BM075306; *GAPDH* (NM001111943).

25

## 26 **Summary**

27 *Ustilago maydis* is a model organism to study biotrophic plant-pathogen interactions. Sexual  
28 and pathogenic development of the fungus are tightly connected since fusion of compatible  
29 haploid sporidia is prerequisite for infection of the host plant, maize (*Zea mays*). After plant  
30 penetration, the unfolded protein response (UPR) is activated and required for biotrophic  
31 growth. The UPR is continuously active throughout all stages of pathogenic development *in*  
32 *planta*. However, since development of UPR deletion mutants stops directly after plant  
33 penetration, the role of an active UPR at later stages of development has/could not be  
34 examined, yet. Here, we establish a gene expression system for *U. maydis* that uses  
35 endogenous, conditionally active promoters to either induce or repress expression of a gene of  
36 interest during different stages of plant infection. Integration of the expression constructs into  
37 the native genomic locus and removal of resistance cassettes were required to obtain a wild  
38 type-like expression pattern. This indicates that genomic localization and chromatin structure  
39 are important for correct promoter activity and gene expression. By conditional expression of  
40 the central UPR regulator, Cib1, in *U. maydis*, we show that a functional UPR is required for  
41 continuous plant defense suppression after host infection and that *U. maydis* relies on a robust  
42 control system to prevent deleterious UPR hyperactivation.

43

## 44 **Introduction**

45 The phytopathogenic basidiomycete *Ustilago maydis* causes the smut disease on maize (*Zea*  
46 *mays*) and is a well-established model organism to study sexual fungal development and  
47 biotrophic fungal/plant interactions, but also basic cellular processes such as DNA  
48 recombination and vesicular transport (Bakkeren *et al.*, 2008; Banuett, 1995; Dean *et al.*,  
49 2012; Kahmann and Kämper, 2004; Lanver *et al.*, 2018).

50

51 The available genome sequence, a broad range of molecular techniques and tools, as well as a  
52 highly efficient homologous recombination system enable the precise genetic manipulation of  
53 *U. maydis* (Brachmann *et al.*, 2004; Kämper, 2004; Kämper *et al.*, 2006; Schuster *et al.*, 2016;  
54 Terfrüchte *et al.*, 2014). Common and frequently used ways to characterize gene functions are  
55 available including deletion or overexpression of genes, as well as the generation of gene  
56 fusions for fluorescence microscopy or epitope tagging. PCR-based methods for gene  
57 replacement via homologous recombination as well as promoters for constitutive, inducible or  
58 titratable (over)expression of genes like the *tef*, *otef*, *nar1*, *crg1* or *tet-Off* promoter are also  
59 available (Banks *et al.*, 1993; Bottin *et al.*, 2002; Brachmann *et al.*, 2004; Kämper, 2004;  
60 Spellig *et al.*, 1996; Zarnack *et al.*, 2008). These promoters can be fused to a gene of interest  
61 and are either integrated in the native gene locus or into the locus of the succinate  
62 dehydrogenase-encoding gene (*UMAG\_00844*, *sdh2*; *ip* locus) by homologous recombination,  
63 conferring carboxin resistance (Keon *et al.*, 1991). However, gene expression analysis using  
64 metabolism-dependent promoters may result in pleiotropic effects due to metabolic changes  
65 and unwanted overexpression of the gene of interest. Other conditional gene expression  
66 systems in fungi include for example estrogen-, orzearalenone-, or light-inducible expression  
67 systems for *Aspergillus sp.* (Pachlinger *et al.*, 2005), *Gibberella zeae* (Lee *et al.*, 2010), or  
68 *Neurospora crassa* (Salinas *et al.*, 2018), respectively (see Kluge *et al.*, 2018 for a

69 comprehensive overview). These systems are all suitable to control gene expression under  
70 axenic culture conditions. However, tools to address the function of genes specifically during  
71 the process of organismal interactions, such as fungal/plant interactions, are not well  
72 established, yet.

73

74 *U. maydis* is a dimorphic fungus, specifically infecting its host plant maize. Sexual and  
75 pathogenic development are interconnected because plant infection requires cell/cell fusion of  
76 compatible haploid sporidia to generate the infectious, dikaryotic filament. Development of  
77 the fungus including mating, filamentous growth, plant penetration and biotrophic growth *in*  
78 *planta* are controlled by a tetrapolar mating-type system (Hartmann *et al.*, 1996; Bölker,  
79 2001; Feldbrügge *et al.*, 2004; Wahl *et al.*, 2010). The *a*-mating type locus encodes a  
80 pheromone-receptor system that regulates cell-cell recognition and fusion (Bölker *et al.*,  
81 1992), whereas all subsequent steps of pathogenic development are controlled by the  
82 bE/bW-heterodimer encoded by the *b*-mating type locus (Schulz *et al.*, 1990; Kämper *et al.*,  
83 1995; Heimel *et al.*, 2010a; Wahl *et al.*, 2010). After penetration of the plant surface,  
84 *U. maydis* establishes a compatible biotrophic interaction with the host plant by secreting  
85 effectors that suppress plant defense reactions (Lanver *et al.*, 2017; Lo Presti *et al.*, 2015a).  
86 Expression of effector-encoding genes is specifically induced during the fungal/plant  
87 interaction (Kämper *et al.*, 2006; Lanver *et al.*, 2018), resulting in increased stress imposed on  
88 the endoplasmic reticulum (ER). Activation of the unfolded protein response (UPR) is critical  
89 to counteract elevated ER stress levels and for efficient secretion of effector proteins (Hampel  
90 *et al.*, 2016; Pinter *et al.*, 2019; Lo Presti *et al.*, 2015b). The UPR is controlled by a key  
91 regulatory bZIP transcription factor termed Hac1 in *Saccharomyces cerevisiae*, XBP1 in  
92 higher eukaryotes and Cib1 in *U. maydis* (Cox and Walter, 1996; Heimel *et al.*, 2013;  
93 Kawahara *et al.*, 1998; Rügsegger *et al.*, 2001). The UPR is activated by unconventional  
94 cytoplasmic splicing of the *HAC1/cib1/XBP1* mRNA, generating the processed form of the

95 mRNA (e.g. *cib1<sup>s</sup>*) that is translated into the active transcription factor. Hence, the effects of  
96 genetic UPR activation can be analyzed by expression of the *cib1<sup>s</sup>* mRNA without drug  
97 induced side-effects.

98

99 In fungal human and plant pathogens, a functional UPR is necessary for disease development  
100 (Cheon *et al.*, 2011; Heimel *et al.*, 2013; Joubert *et al.*, 2011; Kong *et al.*, 2015; Richie *et al.*,  
101 2009; Yi *et al.*, 2009). In *U. maydis*, the UPR is specifically activated after plant penetration  
102 and remains constantly active during all subsequent stages of biotrophic growth inside the  
103 host plant (Heimel *et al.*, 2013). This suggests that the UPR is constantly required for efficient  
104 protein secretion and regulation of pathogenic growth. However, since *cib1* mutant strains are  
105 arrested early after plant infection, the relevance of a functional UPR at later stages of  
106 biotrophic development *in planta* could not be addressed, yet.

107

108 Here, we established a system for conditional and stage-specific gene expression during  
109 pathogenic growth of *U. maydis in planta*. Based on previously published time-resolved  
110 transcriptome data of fungal gene expression during biotrophic growth (Lanver *et al.*, 2018),  
111 genes with desired *in planta* expression patterns were identified and their promoters were  
112 used for conditional gene expression. Importantly, we observed that maintenance of the  
113 genomic context and removal of resistance marker cassettes are required for correct promoter  
114 activity and conditional gene expression. To address the function of the UPR regulator Cib1 at  
115 later stages of biotrophic development, we used conditional promoters to repress, induce or  
116 overexpress *cib1* at specific stages of biotrophic growth *in planta*. We thereby demonstrate  
117 that *U. maydis* is resistant to UPR hyperactivation after plant penetration, suggesting effective  
118 strategies to prevent or cope with deleterious ER stress. By contrast, repression of *cib1*  
119 expression at 2 or 4 days post inoculation (dpi) revealed that a functional UPR is not only

120 essential for establishment of biotrophy, but also required for colonization and continuous  
121 suppression of the plant defense at later stages of development *in planta*.

122

## 123 **Results**

### 124 **Genomic localization and the presence of resistance marker cassettes affect the activity** 125 **of promoters specifically expressed *in planta***

126 In previous studies, promoters of *U. maydis mig* (maize induced genes)-genes that are  
127 specifically expressed *in planta* were used for conditional gene expression during infection  
128 (Lo Presti *et al.*, 2015b; Scherer *et al.*, 2006; Wahl *et al.*, 2010). In addition to the *mig1* gene  
129 (Basse *et al.*, 2000), *mig* genes include the *mig2* gene cluster harboring five highly  
130 homologous genes, all of which are plant-specifically expressed but not involved in the  
131 virulence of *U. maydis* (Basse *et al.*, 2002). The *mig2*-genes (*mig2\_1*, *mig2\_2*, *mig2\_3*,  
132 *mig2\_4* and *mig2\_5*) differ in their strength and temporal dynamics of expression. Thus, their  
133 promoters represent suitable targets for controlled and plant-specific  
134 expression/overexpression of a gene of interest.

135

136 To address the effect of overexpressing the spliced version of the *cib1* mRNA (*cib1<sup>s</sup>* in the  
137 following text), encoding the UPR regulator Cib1, during pathogenic development *in planta*,  
138 we integrated a  $P_{mig2_1}:cib1^s$  promoter fusion into the *ip* locus of the solopathogenic SG200  
139 strain (Kämper *et al.*, 2006). The *ip* or *cbx* locus is commonly used for integration of linear  
140 DNA into the *U. maydis* genome by homologous recombination, conferring resistance against  
141 carboxin (Brachmann, 2001). Since the virulence of strain SG200P $_{mig2_1}:cib1^s$  was severely  
142 attenuated in plant infection experiments (Figure 1A), we investigated at which stage  
143 pathogenic development was blocked. Our analysis revealed the inability of  
144 SG200P $_{mig2_1}:cib1^s$  to induce filamentous growth on charcoal containing solid media and on

145 the leaf surface (Figure 1B), suggesting that pathogenic development is abrogated before plant  
146 penetration.

147

148 We have previously shown that constitutive expression of *cib1<sup>s</sup>* inhibits the formation of  
149 infectious filaments (Heimel *et al.*, 2013). Hence, we tested if integration of the  $P_{mig2:1}:cib1^s$   
150 construct into the *ip* locus might result in increased expression levels of *cib1<sup>s</sup>* during growth  
151 in axenic culture. Indeed, levels of *cib1<sup>s</sup>* were significantly increased in strain  
152 SG200 $P_{mig2:1}:cib1^s$ , when compared to the SG200 control strain (Figure 1C). Since elevated  
153 *cib1<sup>s</sup>* levels might either result from increased activity of the *cib1* wild type (WT) ORF that is  
154 also present in SG200 $P_{mig2:1}:cib1^s$ , or from "leaky"  $P_{mig2:1}$ -driven expression, we used the  
155  $\Delta cibl$  background for further analyses. To study if this effect is specific for the *ip* locus, we  
156 generated *U. maydis* strain FB1 $\Delta cibl \Delta mig2_1::cib1^s$  (*mig2\_1* locus (+Nat<sup>R</sup>)) by replacing the  
157 *mig2\_1* ORF with the *cib1<sup>s</sup>* gene. To exclude potential effects of the resistance cassette used  
158 for integration, the nourseothricin (Nat<sup>R</sup>) resistance cassette was removed by FLP/FRT  
159 recombination (Khrunyk *et al.*, 2010). This revealed that elevated *cib1<sup>s</sup>*-levels indeed resulted  
160 from aberrant  $P_{mig2:1}$  activity and only strains in which the nourseothricin resistance marker  
161 was removed (*mig2\_1* locus (-Nat<sup>R</sup>)) were devoid of any detectable *cib1<sup>s</sup>* expression (Figure  
162 1C). In summary, our data strongly suggest that both the genomic locus and the presence of a  
163 resistance marker contribute to the increased activity of the *mig2\_1* promoter in axenic  
164 culture.

165

166 To pinpoint if this effect is specific for *cib1<sup>s</sup>*, we performed an analogous experiment with the  
167 *pit1* and *pit2* genes, which are divergently transcribed from the same promoter. In axenic  
168 culture, expression of both genes is barely detectable but highly induced during biotrophic  
169 growth *in planta* (Doehlemann *et al.*, 2011; Lanver *et al.*, 2018). We determined expression  
170 levels of both genes when (re-)integrated into *U. maydis* strain SG200 $\Delta pit1/2$  (Hampel *et al.*,



171 2016) into 1) the *ip* locus or the native *pit1/2* locus, using either 2) nourseothricin (Nat<sup>R</sup>) or 3)  
172 hygromycin resistance (Hyg<sup>R</sup>) cassettes and 4) after removal of the resistance marker (Figure  
173 1D). Surprisingly, transcript levels of both *pit1* and *pit2* were drastically increased when  
174 integrated into the *ip* locus (approximately 400-fold and 800-fold, respectively) in comparison  
175 to the SG200 (WT) control. Even when expressed from their native genomic locus, transcript  
176 levels of both genes were still significantly increased (*pit1*: 49-fold (Nat<sup>R</sup>) and 10-fold  
177 (Hyg<sup>R</sup>); *pit2*: 134-fold (Nat<sup>R</sup>) and 13-fold (Hyg<sup>R</sup>)) and only after removal of the resistance  
178 marker cassette (*pit1/2* locus (-Hyg<sup>R</sup>)) expression of *pit1* and *pit2* was similar to the SG200  
179 (WT) control (Figure 1D). In summary, these data demonstrate that the locus of integration  
180 and the presence of resistance marker cassettes influence the activity of “conditional  
181 promoters”.

182

### 183 **Overexpression of *cib1<sup>s</sup>* does not disturb pathogenic development *in planta***

184 To set up a system that allows for proper functioning of conditional promoters we constructed  
185 plasmids harboring promoters of the *mig1*, *mig2\_1*, *mig2\_2* or *mig2\_3* genes. 3' sequences  
186 were followed by a *SfiI* restriction site for integration of the gene of interest, an FRT-Hyg<sup>R</sup> or  
187 an FRT-Nat<sup>R</sup> resistance marker cassette and a 1kb sequence harboring the 3' UTR for  
188 recombination and integration into the genomic locus of respective *mig* genes. It is important  
189 to note that neither single nor the combined deletion of all *mig* genes negatively affected  
190 pathogenic development of *U. maydis* (Farfsing *et al.*, 2005). To specifically increase *cib1<sup>s</sup>*  
191 levels *in planta* and address the effect of UPR hyperactivation on pathogenic development,  
192 we expressed *cib1<sup>s</sup>* under control of the *mig1* or the *mig2\_1* promoter. To this end, the *mig1* or  
193 *mig2\_1* ORFs were replaced by *cib1<sup>s</sup>*, followed by the removal of the resistance marker  
194 cassette in the *U. maydis* strain FB1Δ*cib1* (Heimel *et al.*, 2010b) (see Supplemental Figure 1  
195 for an overview of the approach). We first checked for leaky *cib1<sup>s</sup>*-expression by testing ER  
196 stress resistance and filamentous growth of the generated strains. When spotted on solid

197 media supplemented with the ER stress-inducing drugs tunicamycin (TM) or dithiothreitol  
198 (DTT), the hyper-susceptibility of the FB1 $\Delta$ *cib1* progenitor strain was not suppressed,  
199 suggesting that  $P_{mig1}$  and  $P_{mig2\_1}$  are not active in axenic culture (Figure 2A). Consistently,  
200 filamentous growth of respective strain combinations was not affected in mating assays on  
201 charcoal containing potato dextrose (PD) solid media (Figure 2B), thus confirming the  
202 absence of leaky *cib1*<sup>s</sup> expression.

203

204 Mixtures of mating compatible strains FB1, FB2, FB1 $\Delta$ *cib1*, FB2 $\Delta$ *cib1*, and the derivatives  
205 FB1 $\Delta$ *cib1* $\Delta$ *mig1::cib1*<sup>s</sup> and FB1 $\Delta$ *cib1* $\Delta$ *mig2\\_1::cib1*<sup>s</sup> were used for plant infection studies  
206 (Figure 2C).  $P_{mig1}$ - or  $P_{mig2\_1}$ -mediated expression of *cib1*<sup>s</sup> did not affect pathogenicity when  
207 strains were combined with the compatible FB2 WT strain. By contrast, when  
208 FB1 $\Delta$ *cib1* $\Delta$ *mig1::cib1*<sup>s</sup> or FB1 $\Delta$ *cib1* $\Delta$ *mig2\\_1::cib1*<sup>s</sup> were combined with the compatible  
209 FB2 $\Delta$ *cib1* deletion mutant, virulence was strongly increased compared to the non-pathogenic  
210 FB1 $\Delta$ *cib1* x FB2 $\Delta$ *cib1* control, although not to WT (FB1 x FB2) levels. This result suggests  
211 that the mechanisms to prevent UPR hyperactivation *in planta* are robust and efficient in  
212 *U. maydis* thereby confirming the previous assumption that the UPR is specifically required  
213 during biotrophic development *in planta* (Heimel *et al.*, 2010b; Heimel *et al.*, 2013).

214

### 215 **Establishment of a system for *in planta*-specific gene depletion**

216 We next aimed to establish a gene expression system that would allow us to examine gene  
217 functions during defined developmental stages *in planta* by using promoters that are  
218 specifically repressed during plant infection. To this end, we screened the publicly available  
219 RNAseq data set published by Lanver *et al.*, 2018 and identified a total of four candidate  
220 genes which are expressed during axenic growth and early steps of pathogenic development  
221 before plant penetration, but strongly repressed shortly after plant penetration (1-2 dpi;

222 *UMAG\_00050*, *UMAG\_05690* and *UMAG\_12184*), or at later stages during biotrophic  
223 growth *in planta* (*UMAG\_03597*) (Lanver *et al.*, 2018).

224

225 We focused on *UMAG\_12184* and *UMAG\_03597* for our current studies. Both genes are  
226 expressed in axenic culture and at early stages of pathogenic development, but are strongly  
227 repressed at 2 (*UMAG\_12184*) or 4 dpi (*UMAG\_03597*) (Figure 3A), during and shortly after  
228 *U. maydis* has established a compatible biotrophic interaction with its host plant. To test if  
229 these genes are involved in virulence, we deleted the genes in the haploid, solopathogenic  
230 *U. maydis* strain SG200. SG200 expresses a compatible bE1/bW2-heterodimer, and is thus  
231 capable of forming filaments and infecting its host plant, *Z. mays*, without the need of a  
232 compatible mating partner (Kämper *et al.*, 2006). Both deletion strains were not affected in  
233 virulence (Figure 3B), demonstrating that these genes are dispensable for pathogenic  
234 development. In addition, neither ER or cell wall stress resistance, nor filamentous growth on  
235 charcoal containing PD solid media were strongly affected by either deletion, although  
236 filament formation was reduced in the *UMAG\_03597* deletion mutant (Supplemental Figure  
237 2). However, since SG200 $\Delta$ *UMAG\_03597* showed full virulence, this phenotype does not  
238 impair the ability of the fungus to cause disease. Based on these results, the respective  
239 promoters were regarded as suitable candidates to be used for conditional gene expression.

240

#### 241 **Cib1 is required throughout biotrophic development *in planta***

242 The bZIP transcription factor Cib1 is the central regulator of the UPR in *U. maydis*, and  
243 required for coordinating pathogenic development, efficient secretion of effectors and plant  
244 defense suppression (Heimel *et al.*, 2013; Pinter *et al.*, 2019). Pathogenic development of *cib1*  
245 deletion strains is blocked immediately after plant penetration resulting in the complete  
246 absence of tumor formation (Heimel *et al.*, 2013). To test if *cib1* is only important directly  
247 after plant penetration (e.g., for release of the cell cycle block and establishment of the

248 biotrophic interaction), or if it is also necessary at later stages of pathogenic development, we  
249 expressed *cib1* under control of the *UMAG\_12184* and *UMAG\_03597* promoters (shut off at 2  
250 and 4 dpi, respectively). To this end, we replaced *UMAG\_12184* or *UMAG\_03597* genes with  
251 the *cib1* ORF in strain FB2 $\Delta$ *cib1* (Heimel *et al.*, 2010b), generating strains FB2 $\Delta$ *cib1*  
252  $\Delta$ *UMAG\_12184::cib1* and FB2 $\Delta$ *cib1*  $\Delta$ *UMAG\_03597::cib1*. Resistance cassettes used for  
253 selection of successful integration events were removed by FLP/FRT mediated recombination  
254 (Khrunyk *et al.*, 2010).

255

256 The generated strains were tested for correct expression of *cib1* under axenic conditions by  
257 ER stress assays using TM or DTT. Both mutants showed ER stress resistance similar to the  
258 WT (FB2) control, demonstrating that *cib1* expression driven by either promoter is sufficient  
259 to suppress the ER-stress hypersensitivity of the FB2 $\Delta$ *cib1* progenitor strain (Figure 4A)  
260 (Heimel *et al.*, 2013). Additionally, when compatible mixtures of WT (FB1 x FB2),  $\Delta$ *cib1*  
261 derivatives (FB1 $\Delta$ *cib1* x FB2 $\Delta$ *cib1*) or derivatives expressing *cib1* under control of  
262 conditional promoters (FB1 $\Delta$ *cib1* x FB2 $\Delta$ *cib1* $\Delta$ *UMAG\_12184::cib1* or FB1 $\Delta$ *cib1* x  
263 FB2 $\Delta$ *cib1* $\Delta$ *UMAG\_03597::cib1*) were spotted on charcoal containing PD solid media (Figure  
264 4B), all tested combinations developed white fuzzy colonies (Banuett and Herskowitz, 1989)  
265 indicating that mating is not affected in these strains.

266

267 Next, we investigated the effect of plant-specific repression of *cib1* in plant infection assays.  
268 When compatible mixtures of FB1 $\Delta$ *cib1* x FB2 strains were used for inoculation of maize  
269 plants, symptom development was indistinguishable from the WT (FB1 x FB2) control  
270 (Figure 4C), demonstrating that a single functional copy of *cib1* is sufficient for full virulence  
271 of the fungus. However, when *cib1* was expressed under the control of  $P_{UMAG_12184}$  (FB1 $\Delta$ *cib1*  
272 x FB2 $\Delta$ *cib1* $\Delta$ *UMAG\_12184::cib1*), virulence was almost completely abolished and no tumors  
273 were formed, resembling the  $\Delta$ *cib1* phenotype. By contrast, expression of *cib1* under the

274 control of  $P_{UMAG\_03597}$  (FB1 $\Delta$ *cib1* x FB2 $\Delta$ *cib1* $\Delta$ UMAG\_03597::*cib1*) was sufficient to trigger  
275 anthocyanin production and the formation of small tumors. This indicates that prolonged  
276 expression of *cib1* is sufficient to overcome the developmental block of  $\Delta$ *cib1* strains, and  
277 initiate pathogenic growth *in planta*.

278

279 To visualize fungal growth *in planta* and assess at which step biotrophic development of the  
280 fungus stopped, infected leaves were harvested at 2, 4 and 6 dpi and stained with Chlorazol  
281 Black E (Figure 5A). Microscopic analysis revealed extensive proliferation and clamp cell  
282 formation when plants were inoculated with combinations of WT (FB1 x FB2) or FB1 x  
283 FB2 $\Delta$ *cib1* strains. When *cib1* was expressed under the control of  $P_{UMAG\_12184}$  until 2 dpi  
284 (FB1 $\Delta$ *cib1* x FB2 $\Delta$ *cib1* $\Delta$ UMAG\_12184::*cib1*) infectious dikaryotic filaments penetrated the  
285 plant surface via appressoria at 2 dpi, but did not progress further in the plant at later stages (4  
286 and 6 dpi). Consequently, clamp cell formation and extended fungal proliferation was not  
287 observed. By contrast, expression of *cib1* under control of  $P_{UMAG\_03597}$ ::*cib1*  
288 (FB2 $\Delta$ *cib1* $\Delta$ UMAG\_03597::*cib1*) enabled the fungus to overcome the cell cycle block and  
289 induce proliferation, as reflected by hyphal branching and the formation of clamp cells at 4  
290 dpi. However, the subsequent colonization of host tissue by fungal hyphae at 6 dpi appeared  
291 strongly reduced in comparison to the controls (FB1 x FB2 and FB1 $\Delta$ *cib1* x FB2) (Figure  
292 5A). This suggests that the reduced activity of  $P_{UMAG\_03597}$  and the resulting decrease of *cib1*  
293 levels at this stage prevents further progression of fungal hyphae inside the plant.

294

295 Previous studies revealed that plants inoculated with  $\Delta$ *cib1* mutant strains show increased  
296 plant defense reactions as demonstrated by elevated expression of pathogenesis related (*PR*)  
297 gene expression at 2 dpi (Heimel *et al.*, 2013). It is conceivable that this observation is  
298 connected to the requirement of a functional UPR for efficient secretion and processing of  
299 effectors (Lo Presti *et al.*, 2015b; Hampel *et al.*, 2016; Pinter *et al.*, 2019). To investigate if

300 Cib1 is also required for plant defense suppression at later stages, we determined expression  
301 levels of *PR* genes *PR1*, *PR3* and *PR5* at 2, 4 and 6 dpi in plants inoculated with strains  
302 conditionally expressing *cib1*. All three *PR* genes are markers for salicylic acid (SA)-related  
303 defense responses that are typically suppressed by biotrophic plant pathogens like *U. maydis*  
304 (Glazebrook, 2005). Consistent with the results obtained in infection studies,  
305 *P<sub>UMAG\_12184</sub>*-driven expression of *cib1* resulted in increased expression of *PR3* and *PR5* genes  
306 at 2 dpi, whereas expression of *PR1* was not induced (Figure 5B). By contrast, when *cib1* was  
307 expressed under the control of *P<sub>UMAG\_03597</sub>*, expression of all three *PR* genes was induced at 6  
308 dpi. These observations are consistent with the expected activity of the *P<sub>UMAG\_12184</sub>* and  
309 *P<sub>UMAG\_03597</sub>* promoters that are repressed at 2 and 4 dpi, respectively. Hence, our data indicate  
310 that *cib1* expression under control of the promoter of *UMAG\_12184* is not sufficient to  
311 establish a compatible biotrophic interaction *in planta* leading to a block in pathogenic  
312 development. By contrast, when *cib1* is expressed for an extended time (from promoter  
313 *P<sub>UMAG\_03597</sub>*), a compatible interaction appears to be established, allowing further proliferation.  
314 This suggests that *cib1* is required for plant defense suppression not only at the onset (2 dpi),  
315 but also during later (4 and 6 dpi) stages of biotrophic development *in planta*.  
316

## 317 **Discussion**

318 Analysis of gene function typically involves the generation of gene deletion and  
319 overexpression strains. To test for functions related to the virulence of plant pathogenic fungi,  
320 deletion strains are inoculated into the host plant and scored for development of disease  
321 symptoms (Dean *et al.*, 2012). However, the analysis of virulence factors that are essential for  
322 pathogenic development relies on the description of the first phenotype that is observed, i.e.  
323 the stage when pathogenic development is blocked. Hence, potential functions of these factors  
324 that might also be important at later stages of pathogenic development have not been  
325 addressed and remain elusive. To date, suitable tools to address this problem are restricted to  
326 the introduction of a gate keeper mutation in kinases that can be chemically inhibited by non-  
327 hydrolyzable ATP analogs. However, this strategy is only suitable for the analysis of kinase  
328 functions and requires extensive controls to exclude potential side-effects of the chemical  
329 treatment (Sakulkoo *et al.*, 2018).

330

331 In this study, we report a conditional gene expression system for *U. maydis* that enables the  
332 study of gene functions at different stages of pathogenic development in the plant. We  
333 identified suitable promoters that are active during axenic growth and repressed during  
334 pathogenic growth *in planta*. We demonstrate that promoters (e.g.,  $P_{mig2\_1}$  or  $P_{pit1/2}$ ),  
335 previously used for plant-specific gene expression, are active during axenic growth and  
336 produce considerable amounts of transcripts (up to 800-fold induced expression for *pit2*)  
337 when integrated into the *ip* locus or when resistance marker cassettes are located in their  
338 vicinity. Proper promoter function required the maintenance of the genomic environment by  
339 “in locus” integration (as demonstrated for the *mig2\_1* or *pit1/2* genes) and removal of the  
340 resistance marker cassette.

341

342 Similar to the *mig2* gene cluster, the virulence factors *pit1* and *pit2* are part of a gene cluster  
343 that is specifically upregulated *in planta* (Basse *et al.*, 2002; Doehlemann *et al.*, 2011).  
344 Interestingly, gene expression of the majority of effector gene clusters including *mig2*- and  
345 *pit*-clusters is induced in strains deleted for the histone deacetylase *hda1* (Reichmann *et al.*,  
346 2002; Treutlein, 2007), suggesting that these clusters are subject to epigenetic regulation. It  
347 remains to be investigated if this effect is restricted to clustered effector genes or accounts for  
348 the regulation of non-clustered effectors as well. Chromatin-based regulation of effector genes  
349 appears to be a common feature in plant pathogenic fungi (Soyer *et al.*, 2014). It is well  
350 established that the RNA polymerase II complex closely interacts with histone modifying  
351 enzymes, including the SWI/SNF complex and histone acetyltransferases (Wittschieben *et al.*,  
352 1999; Wittschieben *et al.*, 2000). This complex is supposed to function as a chromatin  
353 snowplow leading to increased accessibility of the genomic neighborhood (Barton and Crowe,  
354 2001). Hence, although the underlying molecular details remain to be addressed, it is tempting  
355 to speculate that high expression of the *sdh2* gene (*ip* locus), or of highly expressed resistance  
356 marker genes might affect the chromatin structure and thus de-repress silent promoters in their  
357 vicinity.

358

359 The conditional overexpression of *cib1<sup>s</sup>* using the *mig1* or *mig2\_1* promoter did not result in  
360 alterations of disease symptoms. Because the *mig1* promoter is highly active *in planta* (Basse  
361 *et al.*, 2000; Lanver *et al.*, 2018), it is especially remarkable that high levels of *cib1<sup>s</sup>* are not  
362 detrimental for fungal proliferation *in planta*. This suggests that *U. maydis* has established  
363 effective control mechanisms to prevent UPR hyperactivation, one of which is based on the  
364 functional modification of the UPR by the Cib1/Clp1 interaction, providing ER stress hyper-  
365 resistance of Clp1-expressing strains (Heimel *et al.*, 2013; Pinter *et al.*, 2019). A potential  
366 second mechanism might be reminiscent of UPR regulation in higher eukaryotes and involve  
367 the unspliced *cib1* transcript, or the encoded Cib1<sup>u</sup> protein (Heimel *et al.*, 2013). In higher



368 eukaryotes, the U-isoform of the Hac1-like UPR regulator XBP1 functions as a repressor of  
369 the UPR (Yoshida *et al.*, 2006). Hence, a similar mode of action would potentially counteract  
370 increased *cib1<sup>s</sup>* levels, as expression of the unspliced *cib1* transcript itself is subject to  
371 Cib1-dependent gene regulation.

372

373 The increasing body of transcriptomic data provides a highly valuable treasure box to identify  
374 promoters with desired expression dynamics. In theory, this enables establishment of  
375 tailor-made expression systems to address gene specific functions in a sophisticated manner.  
376 However, our attempt to identify promoters that are active during axenic growth, but strongly  
377 repressed at different stages of pathogenic development *in planta* revealed only a low number  
378 of candidates. Moreover, we observed that it is desirable for correct promoter function to  
379 maintain the genomic context. Using Cib1, an essential virulence factor in *U. maydis*, we  
380 carried out a proof-of-principle analysis demonstrating that a functional UPR is not only  
381 required directly after penetration of the leaf surface (Heimel *et al.*, 2010b; Heimel *et al.*,  
382 2013), but also at later stages of pathogenic development. The increased expression of *PR*  
383 genes correlates with repression of promoter activity and thus reduced *cib1* transcript levels.  
384 This strongly suggests that continuous suppression of the SA-related plant defense depends on  
385 sustained UPR activity. This is consistent with the observation that not only early but also late  
386 effectors require the UPR for efficient secretion and/or processing (Lo Presti *et al.*, 2015b;  
387 Hampel *et al.*, 2016; Pinter *et al.*, 2019). Although our system is applicable for a wide range  
388 of genes, a potential limitation is met when examining stage-specific functions of genes with  
389 dynamic expression patterns. One way to enable these studies would be the stage specific  
390 expression of site-specific recombinases, such as CRE or FLP (Sadowski, 1995; Sternberg  
391 and Hamilton, 1981; Sauer and Henderson, 1988), as established for a variety of model  
392 systems including numerous fungi (Khrunyk *et al.*, 2010; Kopke *et al.*, 2010; Kück and Hoff,  
393 2010; Mizutani *et al.*, 2012; Twaruschek *et al.*, 2018; Zhang *et al.*, 2013). In this way, loxP or

394 FRT flanked genes could be targeted for genomic deletion in a stage- or development-  
395 specific manner, while maintaining their dynamic expression pattern.

396

397 In summary, we established a conditional expression system that allows one to address plant-  
398 specific functions of genes of interest in the *U. maydis*/maize pathosystem. The generation of  
399 constructs to be integrated into the genome is facilitated by an efficient one step cloning  
400 procedure. Plasmids for conditional induction or repression of genes during biotrophic  
401 development *in planta* are cross compatible and harbor identical *Sfi*I restriction sites for easy  
402 exchange of genes. Since the constructs can either be integrated into the genome of  
403 solopathogenic or compatible haploid strains, future studies using combinations of  
404 conditionally expressed constructs will allow the consideration of even more sophisticated  
405 scientific questions, such as the relevance of posttranslational modifications or enzymatic  
406 activity of a protein for biotrophic growth of *U. maydis*.

407

408

## 409 **Experimental Procedures**

### 410 **Strains and Growth Conditions**

411 *Escherichia coli* TOP10 strain was used for cloning and amplification of plasmid DNA. *U.*  
412 *maydis* cells were grown at 28°C in YEPS light medium (Tsukuda *et al.*, 1988), complete  
413 medium (CM) (Holliday, 1974) or yeast nitrogen base (YNB) medium (Freitag *et al.*, 2011;  
414 Mahlert *et al.*, 2006). Mating assays were performed as described before (Brachmann *et al.*,  
415 2001). ER-stress assays were carried out on YNB solid media containing the indicated  
416 concentrations of DTT or TM (Sigma-Aldrich). Sensitivity to Calcofluor White or Congo red  
417 was tested by drop-assay on YNB solid media containing the indicated concentration of the  
418 respective compound. Filamentous growth assays were carried out using potato-dextrose (PD)  
419 media supplemented with 1% charcoal (PD-CC) (Holliday, 1974). Strains used in this study  
420 are listed in Supplemental Table 1.

421

### 422 **DNA and RNA procedures**

423 Molecular methods followed described protocols (Sambrook *et al.*, 1989). For gene deletions,  
424 a PCR-based approach was used (Kämper, 2004). Isolation of genomic DNA from *U. maydis*  
425 and transformation procedures were performed according to Schulz *et al.*, 1990. Homologous  
426 integration was performed using linearized plasmid DNA or PCR-amplified DNA. Integration  
427 was verified by Southern hybridization. Total RNA was extracted from exponentially growing  
428 cells in axenic culture using Trizol reagent according to the manufacturer's instructions  
429 (Invitrogen, Karlsruhe, Germany). RNA integrity was checked by agarose-gel-  
430 electrophoresis. Residual DNA was removed from total RNA samples using the TURBO  
431 DNA-free<sup>TM</sup> Kit (Ambion, Darmstadt, Germany). cDNA was synthesized using the iScript<sup>TM</sup>  
432 cDNA Synthesis Kit (BioRad, Munich, Germany). Primers used in this study are listed in  
433 Supplemental Table 2.

434

## 435 **Quantitative RT-PCR**

436 qRT-PCR analysis was performed as described (Hampel *et al.*, 2016). For all qRT-PCR  
437 experiments, three independent biological replicates and two technical replicates were  
438 analyzed using the MESA GREEN qPCR MasterMix plus for SYBR Assay with fluorescein  
439 (Eurogentech, Cologne, Germany). qRT-PCR was performed using the CFX Connect Real-  
440 Time PCR Detection System and analyzed with the CFX Manager Maestro Software  
441 (BioRad).

442

## 443 **Plasmid construction**

444 For gene deletions, a PCR-based approach and the *SfiI* insertion cassette system were used  
445 (Brachmann *et al.*, 2004; Kämper, 2004). For construction of plasmids for conditional gene  
446 expression, 0.5-1 kb flanking regions of chosen genes (*UMAG\_03597*, *UMAG\_12184*, *mig1*,  
447 *mig2\_1*) were PCR amplified from genomic DNA, adding a *SfiI* restriction site to the 5' of the  
448 left border (LB) and a *BamHI* (for *UMAG\_12184*, *mig1* and *mig2\_1*) or *KpnI* (for  
449 *UMAG\_03597*) restriction site to the 3' end of the right border (RB). The gene of interest  
450 (GOI; *cib1* or *cib1<sup>s</sup>*) was PCR amplified from genomic DNA or from plasmid P<sub>*cib1:cib1<sup>s</sup>*</sub>,  
451 respectively, adding *SfiI* restriction sites to the 5' and 3' end. The Hyg<sup>R</sup> cassette was amplified  
452 from plasmid pUMa1442 adding a *BamHI* (for *UMAG\_12184*) or *KpnI* restriction site (for  
453 *UMAG\_03597*) to the 3' end and a *SfiI* restriction site to the 5' end. The resulting DNA  
454 fragments were ligated to obtain *LB-GOI-Hyg<sup>R</sup>-RB* or *LB-GOI-Nat<sup>R</sup>-RB* and integrated into  
455 the pCR2.1 TOPO vector (Invitrogen) or the pJet1.2 vector (ThermoFisher Scientific,  
456 Waltham, Massachusetts, USA) according to the manufacturer's instructions to generate  
457 plasmids pCR2.1 P<sub>*UMAG\_12184:cib1*</sub>(NatR), pCR2.1 P<sub>*UMAG\_03597:cib1*</sub>(HygR), pJet1.2  
458 P<sub>*mig2\_1:cib1<sup>s</sup>*</sub>(NatR) and pJet1.2 P<sub>*mig1:cib1<sup>s</sup>*</sub>(NatR).

459 For construction of the P<sub>*mig2\_1:cib1<sup>s</sup>*</sub> construct for *ip* locus integration, the vectors  
460 pMig2\_1:clp1 and pRU11-cib1s were cut with *NdeI* and *EcoRI*. The resulting 2.0 kb *cib1<sup>s</sup>*

461 fragment of pRU11-cib1s (Heimel *et al.*, 2013) and the 5.2 kb backbone of Mig2\_1:clp1 were  
462 ligated to obtain plasmid P<sub>mig2\_1:cib1<sup>s</sup></sub>. Plasmids generated in this study are listed in  
463 Supplemental Table 3.

464

#### 465 **Plant Infections**

466 The haploid, solopathogenic strain SG200 and its derivatives or FB1 and FB2 and their  
467 respective derivatives were grown to an OD600 of 0.6-0.8 in YEPS light medium, adjusted to  
468 an OD600 of 1.0 in water and mixed 1:1 with a compatible mating partner. The resulting  
469 suspension was used to inoculate 8-day-old maize seedlings of the variety Early Golden  
470 Bantam. Plants were grown in a CLF Plant Climatics GroBank (Wertingen, Germany) with a  
471 14 h (28°C) day and 10 h (22 °C) night cycle. Symptoms were scored according to disease  
472 rating criteria reported by Kämper *et al.*, 2006. Three independent clones were used for each  
473 plant infection experiment and the average scores for each symptom are shown in the  
474 respective diagrams. Photographs from infected leaves were taken and represent the most  
475 common infection symptoms for the respective mutant.

476

#### 477 **Chlorazole Black E staining and microscopy**

478 Infected leaf tissue was harvested at 2, 4 and 6 dpi and kept in 100% ethanol until further  
479 processing. Chlorazole Black E staining was performed as described in Brachmann *et al.*,  
480 2001. Microscopic analysis was performed using an Axio Imager.M2 equipped with an  
481 AxioCam MRm camera (ZEISS, Jena, Germany). All images were processed using ImageJ.

482

483

#### 484 **Quantification of *U. maydis* gene expression *in planta* and *PR* gene expression**

485 Infected leaf tissue was harvested at the indicated time points. Samples of five infected maize  
486 seedlings were pooled per replicate, frozen in liquid nitrogen and ground to powder by mortar

487 and pestle according to Lanver *et al.*, 2018. Total RNA was extracted using Trizol reagent  
488 (Invitrogen) and used for qRT-PCR analysis as described above. For expression analysis of *U.*  
489 *maydis* genes, *eIF2b* expression levels were used for normalization. Expression of *PR1*, *PR3*  
490 and *PR5* from *Zea mays* were determined and normalized to *GAPDH* expression levels.

491

## 492 **Statistical Analysis**

493 Statistical significance was calculated using Student's *t* test. The statistical significance of  
494 plant infection phenotypes was calculated using the Mann-Whitney test as described  
495 previously (Freitag *et al.*, 2011). Results were considered significant if the P value was <0.05.

496

## 497 **Accession numbers**

498 Sequence data from this article can be found in the National Center for Biotechnology  
499 Information database under the following accession numbers:

500 *UMAG\_12184*, XP\_011388913.1; *UMAG\_03597*, XP\_011390022.1; *cib1*, *UMAG\_11782*,  
501 XP\_011390112.1; *mig2\_1*, *UMAG\_06178*, XP\_011392548.1; *mig1*, *UMAG\_03223*,  
502 XP\_011389652.1; *pit1*, *UMAG\_01374*, XP\_011387263.1, *pit2*, *UMAG\_01375*,  
503 XP\_011387264.1; *PR1* (Zm.15280.1), BM351351; *PR3* (Zm.1085.1), BM339391; *PR5*  
504 (Zm.6659.1), BM075306; *GAPDH* (NM001111943).

505

## 506 **Acknowledgements**

507 We thank Daniel Lanver and Regine Kahmann for sharing expression data prior to publication  
508 and Ivo Feussner for generous support. All authors acknowledge funding by the Deutsche  
509 Forschungsgemeinschaft (DFG), and the Natural Sciences Engineering Council of Canada  
510 (NSERC) through the International Research Training Group 2172 PRoTECT and a  
511 Discovery Grant (to JWK).

512

## 513 **References**

- 514 **Bakkeren, G., Kämper, J. and Schirawski, J.** (2008) Sex in smut fungi: Structure, function  
515 and evolution of mating-type complexes. *Fungal Genet. Biol.* **45**, 15–21.
- 516 **Banks, G.R., Shelton, P.A., Kanuga, N., Holden, D.W. and Spanos, A.** (1993) The  
517 *Ustilago maydis nar1* gene encoding nitrate reductase activity: sequence and  
518 transcriptional regulation. *Gene* **131**, 69–78.
- 519 **Banuett, F.** (1995) Genetics of *Ustilago maydis*, a Fungal Pathogen That Induces Tumors in  
520 Maize. *Ann. Rev. Genet.* **29**, 179–208.
- 521 **Banuett, F. and Herskowitz, I.** (1989) Different *a* alleles of *Ustilago maydis* are necessary  
522 for maintenance of filamentous growth but not for meiosis. *Proc. Natl. Acad. Sci.* **86**,  
523 5878–5882.
- 524 **Barton, M.C. and Crowe, A.J.** (2001) Chromatin alteration, transcription and replication:  
525 What’s the opening line to the story? *Oncogene* **20**, 3094–3099.
- 526 **Basse, C.W., Kolb, S. and Kahmann, R.** (2002) A maize-specifically expressed gene cluster  
527 in *Ustilago maydis*. *Mol. Microbiol.* **43**, 75–93.
- 528 **Basse, C.W., Stumpferl, S. and Kahmann, R.** (2000) Characterization of a *Ustilago maydis*  
529 Gene Specifically Induced during the Biotrophic Phase: Evidence for Negative as Well  
530 as Positive Regulation. *Mol. Cell. Proteomics* **20**, 329–339.
- 531 **Bölker, M.** (2001) *Ustilago maydis* - A valuable model system for the study of fungal  
532 dimorphism and virulence. *Microbiology* **147**, 1395–1401.
- 533 **Bölker, M., Urban, M. and Kahmann, R.** (1992) The *a* mating type locus of *U. maydis*  
534 specifies cell signaling components. *Cell* **68**, 441–450.
- 535 **Bottin, A., Kämper, J. and Kahmann, R.** (2002) Isolation of a carbon source-regulated gene  
536 from from *Ustilago maydis*. *MGG Mol. Gen. Genet.* **253**, 342.
- 537 **Brachmann, A., König, J., Julius, C. and Feldbrügge, M.** (2004) A reverse genetic

- 538 approach for generating gene replacement mutants in *Ustilago maydis*. *Mol. Genet.*  
539 *Genomics* **272**, 216–226.
- 540 **Brachmann, A., Weinzierl, G., Kämper, J. and Kahmann, R.** (2001) Identification of  
541 genes in the bW/bE regulatory cascade in *Ustilago maydis*. *Mol. Microbiol.* **42**, 1047–  
542 1063.
- 543 **Cheon, S.A., Jung, K.-W., Chen, Y.-L., Heitman, J., Bahn, Y.-S. and Kang, H.A.** (2011)  
544 Unique evolution of the UPR pathway with a novel bZIP transcription factor, HxL1, for  
545 controlling pathogenicity of *Cryptococcus neoformans*. *PLoS Pathog.* **7**, 1–16.
- 546 **Cox, J.S. and Walter, P.** (1996) A Novel Mechanism for Regulating Activity of a  
547 Transcription Factor That Controls the Unfolded Protein Response. *Cell* **87**, 391–404.
- 548 **Dean, R., Kan, J.A.L. Van, Pretorius, Z.A., Hammond-Kosack, K.E., Pietro, A. Di,**  
549 **Spanu, P.D., Rudd, J.J., Dickman, M., Kahmann, R., Ellis, J. and Foster, G.D.**  
550 (2012) The Top 10 fungal pathogens in molecular plant pathology. *Mol. Plant Pathol.*  
551 **13**, 414–430.
- 552 **Doehlemann, G., Reissmann, S., Aßmann, D., Fleckenstein, M. and Kahmann, R.** (2011)  
553 Two linked genes encoding a secreted effector and a membrane protein are essential for  
554 *Ustilago maydis*-induced tumour formation. *Mol. Microbiol.* **81**, 751–766.
- 555 **Farfsing, J.W., Auffarth, K. and Basse, C.W.** (2005) Identification of cis-Active Elements  
556 in *Ustilago maydis mig2* Promoters Conferring High-Level Activity During Pathogenic  
557 Growth in Maize. *Mol. Plant-Microbe Interact.* **18**, 75–87.
- 558 **Feldbrügge, M., Kämper, J., Steinberg, G. and Kahmann, R.** (2004) Regulation of mating  
559 and pathogenic development in *Ustilago maydis*. *Curr. Opin. Microbiol.* **7**, 666–672.
- 560 **Freitag, J., Lanver, D., Böhmer, C., Schink, K.O., Bölker, M. and Sandrock, B.** (2011)  
561 Septation of infectious hyphae is critical for appressoria formation and virulence in the  
562 smut fungus *Ustilago maydis*. *PLoS Pathog.* **7**, 1–15.
- 563 **Glazebrook, J.** (2005) Contrasting Mechanisms of Defense Against Biotrophic and



- 564 Necrotrophic Pathogens. *Annu. Rev. Phytopathol.* **43**, 205–227.
- 565 **Hampel, M., Jakobi, M., Schmitz, L., Meyer, U., Finkernagel, F., Doehlemann, G. and**  
566 **Heimel, K.** (2016) Unfolded Protein Response (UPR) Regulator Cib1 Controls  
567 Expression of Genes Encoding Secreted Virulence Factors in *Ustilago maydis*. *PLoS*  
568 *One* **11**, 1–16.
- 569 **Hartmann, H.A., Kahmann, R. and Bölker, M.** (1996) The pheromone response factor  
570 coordinates filamentous growth and pathogenicity in *Ustilago maydis*. *EMBO J.* **15**,  
571 1632–1641.
- 572 **Heimel, K., Freitag, J., Hampel, M., Ast, J., Bölker, M. and Kämper, J.** (2013) Crosstalk  
573 between the Unfolded Protein Response and Pathways That Regulate Pathogenic  
574 Development in *Ustilago maydis*. *Plant Cell* **25**, 4262–4277.
- 575 **Heimel, K., Scherer, M., Vranes, M., Wahl, R., Pothiratana, C., Schuler, D., Vincon, V.,**  
576 **Finkernagel, F., Flor-Parra, I. and Kämper, J.** (2010a) The transcription factor Rbfl  
577 is the master regulator for *b*-mating type controlled pathogenic development in *Ustilago*  
578 *maydis*. *PLoS Pathog.* **6**, 1–13.
- 579 **Heimel, K., Scherer, M., Schuler, D. and Kämper, J.** (2010b) The *Ustilago maydis* Clp1  
580 Protein Orchestrates Pheromone and *b*-Dependent Signaling Pathways to Coordinate the  
581 Cell Cycle and Pathogenic Development. *Plant Cell* **22**, 2908–2922.
- 582 **Holliday, R.** (1974) Handbook of Genetics 1st ed. King, R., ed, New York, USA: Plenum  
583 Press.
- 584 **Joubert, A., Simoneau, P., Champion, C., Bataillé-Simoneau, N., Iacomi-Vasilescu, B.,**  
585 **Poupard, P., François, J.M., Georgeault, S., Sellier, E. and Guillemette, T.** (2011)  
586 Impact of the unfolded protein response on the pathogenicity of the necrotrophic fungus  
587 *Alternaria brassicicola*. *Mol. Microbiol.* **79**, 1305–1324.
- 588 **Kahmann, R. and Kämper, J.** (2004) *Ustilago maydis*: How its biology relates to  
589 pathogenic development. *New Phytol.* **164**, 31–42.

- 590 **Kämper, J.** (2004) A PCR-based system for highly efficient generation of gene replacement  
591 mutants in *Ustilago maydis*. *Mol. Genet. Genomics* **271**, 103–110.
- 592 **Kämper, J., Kahmann, R., Bölker, M., Ma, L.-J., Brefort, T., Saville, B.J., Banuett, F.,**  
593 **Kronstad, J.W., Gold, S.E., Müller, O., Perlin, M.H., Wösten, H.A.B., Vries, R. de,**  
594 **Ruiz-Herrera, J., Reynaga-Peña, C.G., Snetselaar, K., McCann, M., Pérez-Martín,**  
595 **J., Feldbrügge, M., Basse, C.W., Steinberg, G., Ibeas, J.I., Holloman, W., Guzman,**  
596 **P., Farman, M., Stajich, J.E., Sentandreu, R., González-Prieto, J.M., Kennell, J.C.,**  
597 **Molina, L., Schirawski, J., Mendoza-Mendoza, A., Greilinger, D., Münch, K.,**  
598 **Rössel, N., Scherer, M., Vraneš, M., Ladendorf, O., Vincon, V., Fuchs, U.,**  
599 **Sandrock, B., Meng, S., Ho, E.C.H., Cahill, M.J., Boyce, K.J., Klose, J.,**  
600 **Klosterman, S.J., Deelstra, H.J., Ortiz-Castellanos, L., Li, W., Sanchez-Alonso, P.,**  
601 **Schreier, P.H., Häuser-Hahn, I., Vaupel, M., Koopmann, E., Friedrich, G., Voss, H.,**  
602 **Schlüter, T., Margolis, J., Platt, D., Swimmer, C., Gnirke, A., Chen, F., Vysotskaia,**  
603 **V., Mannhaupt, G., Güldener, U., Münsterkötter, M., Haase, D., Oesterheld, M.,**  
604 **Mewes, H.-W., Mauceli, E.W., DeCaprio, D., Wade, C.M., Butler, J., Young, S.,**  
605 **Jaffe, D.B., Calvo, S., Nusbaum, C., Galagan, J. and Birren, B.W.** (2006) Insights  
606 from the genome of the biotrophic fungal plant pathogen *Ustilago maydis*. *Nature* **444**,  
607 97–101.
- 608 **Kämper, J., Reichmann, M., Romeis, T., Bölker, M. and Kahmann, R.** (1995) Multiallelic  
609 recognition: Nonsel-dependent dimerization of the bE and bW homeodomain proteins in  
610 *Ustilago maydis*. *Cell* **81**, 73–83.
- 611 **Kawahara, T., Yanagi, H., Yura, T. and Mori, K.** (1998) Unconventional Splicing of  
612 *HAC1/ERN4* mRNA Required for the Unfolded Protein Reponse. *Biochemistry* **273**,  
613 1802–1807.
- 614 **Keon, J.P.R., White, G.A. and Hargreaves, J.A.** (1991) Isolation, characterization and  
615 sequence of a gene conferring resistance to the systemic fungicide carboxin from the

- 616 maize smut pathogen, *Ustilago maydis*. *Curr. Genet.* **19**, 475–481.
- 617 **Khrunyk, Y., Münch, K., Schipper, K., Lupas, A.N. and Kahmann, R.** (2010) The use of  
618 FLP-mediated recombination for the functional analysis of an effector gene family in the  
619 biotrophic smut fungus *Ustilago maydis*. *New Phytol.* **187**, 957–968.
- 620 **Kluge, J., Terfehr, D. and Kück, U.** (2018) Inducible promoters and functional genomic  
621 approaches for the genetic engineering of filamentous fungi. *Appl. Microbiol.*  
622 *Biotechnol.* **102**, 6357–6372.
- 623 **Kong, S., Park, S.-Y. and Lee, Y.-H.** (2015) Systematic characterization of the bZIP  
624 transcription factor gene family in the rice blast fungus, *Magnaporthe oryzae*. *Env.*  
625 *Microbiol.* **17**, 1425–1443.
- 626 **Kopke, K., Hoff, B. and Kück, U.** (2010) Application of the *Saccharomyces cerevisiae*  
627 FLP/FRT Recombination System in Filamentous Fungi for Marker Recycling and  
628 Construction of Knockout Strains Devoid of Heterologous Genes. *Appl. Environ.*  
629 *Microbiol.* **76**, 4664–4674.
- 630 **Kück, U. and Hoff, B.** (2010) New tools for the genetic manipulation of filamentous fungi.  
631 *Appl. Microbiol. Biotechnol.* **86**, 51–62.
- 632 **Lanver, D., Tollot, M., Schweizer, G., Presti, L. Lo, Reissmann, S., Ma, L.S., Schuster,**  
633 **M., Tanaka, S., Liang, L., Ludwig, N. and Kahmann, R.** (2017) *Ustilago maydis*  
634 effectors and their impact on virulence. *Nat. Rev. Microbiol.* **15**, 409–421.
- 635 **Lanver, D., Müller, A.N., Happel, P., Schweizer, G., Haas, F.B., Franitza, M., Pellegrin,**  
636 **C., Reissmann, S., Altmüller, J., Rensing, S.A. and Kahmann, R.** (2018) The  
637 Biotrophic Development of *Ustilago maydis* Studied by RNA-Seq Analysis. *Plant Cell*  
638 **30**, 300–323.
- 639 **Lee, J., Son, H., Lee, S., Park, A.R. and Lee, Y.-W.** (2010) Development of a Conditional  
640 Gene Expression System Using a Zearalenone-Inducible Promoter for the Ascomycete  
641 Fungus *Gibberella zeae*. *Appl. Environ. Microbiol.* **76**, 3089–3096.

- 642 **Lo Presti, L., Lanver, D., Schweizer, G., Tanaka, S., Liang, L., Tollot, M., Zuccaro, A.,**  
643 **Reissmann, S. and Kahmann, R.** (2015a) Fungal Effectors and Plant Susceptibility.  
644 *Annu. Rev. Plant Biol.* **66**, 513–545.
- 645 **Lo Presti, L., López Díaz, C., Turrà, D., Pietro, A. Di, Hampel, M., Heimel, K. and**  
646 **Kahmann, R.** (2015b) A conserved co-chaperone is required for virulence in fungal  
647 plant pathogens. *New Phytol.* **208**, 1–14.
- 648 **Mahlert, M., Leveleki, L., Hlubek, A., Sandrock, B. and Bölker, M.** (2006) Rac1 and  
649 Cdc42 regulate hyphal growth and cytokinesis in the dimorphic fungus *Ustilago maydis*.  
650 *Mol. Microbiol.* **59**, 567–578.
- 651 **Mizutani, O., Masaki, K., Gomi, K. and Iefuji, H.** (2012) Modified *Cre-loxP*  
652 Recombination in *Aspergillus oryzae* by Direct Introduction of Cre Recombinase for  
653 Marker Gene Rescue. *Appl. Environ. Microbiol.* **78**, 4126–4133.
- 654 **Pachlinger, R., Mitterbauer, R., Adam, G. and Strauss, J.** (2005) Metabolically  
655 Independent and Accurately Adjustable *Aspergillus* sp. Expression System. *Appl.*  
656 *Environ. Microbiol.* **71**, 672–678.
- 657 **Pinter, N., Hach, A.C., Hampel, M., Rekhter, D., Zienkiewicz, K., Feussner, I., Poehlein,**  
658 **A., Daniel, R., Finkernagel, F. and Heimel, K.** (2019) Signal peptide peptidase activity  
659 connects the unfolded protein response to plant defense suppression by *Ustilago maydis*.  
660 *PLoS Pathog.* **15**, 1–40.
- 661 **Reichmann, M., Jamnischek, A., Weinzierl, G., Ladendorf, O., Huber, S., Kahmann, R.**  
662 **and Kämper, J.** (2002) The histone deacetylase Hda1 from *Ustilago maydis* is essential  
663 for teliospore development. *Mol. Microbiol.* **46**, 1169–1182.
- 664 **Richie, D.L., Hartl, L., Amanianda, V., Winters, M.S., Fuller, K.K., Miley, M.D., White,**  
665 **S., McCarthy, J.W., Latgé, J.P., Feldmesser, M., Rhodes, J.C. and Askew, D.S.**  
666 (2009) A role for the unfolded protein response (UPR) in virulence and antifungal  
667 susceptibility in *Aspergillus fumigatus*. *PLoS Pathog.* **5**, 1–17.

- 668 **Rüegsegger, U., Leber, J.H. and Walter, P.** (2001) Block of HAC1 mRNA translation by  
669 long-range base pairing is released by cytoplasmic splicing upon induction of the  
670 unfolded protein response. *Cell* **107**, 103–114.
- 671 **Sakulkoo, W., Osés-Ruiz, M., Garcia, E.O., Soanes, D.M., Littlejohn, G.R., Hacker, C.,**  
672 **Correia, A., Valent, B. and Talbot, N.J.** (2018) A single fungal MAP kinase controls  
673 plant cell-to-cell invasion by the rice blast fungus. *Science* (80-. ). **1403**, 1399–1403.
- 674 **Salinas, F., Rojas, V., Delgado, V., López, J., Agosin, E. and Larrondo, L.F.** (2018)  
675 Fungal Light-Oxygen-Voltage Domains for Optogenetic Control of Gene Expression and  
676 Flocculation in Yeast. *MBio* **9**, 1–14.
- 677 **Sambrook, J., Frisch, E.F. and Maniatis, T.** (1989) *Molecular Cloning: A Laboratory*  
678 *Manual.*, New York: Cold Spring Harbour Laboratory Press.
- 679 **Sauer, B. and Henderson, N.** (1988) Site-specific DNA recombination in mammalian cells  
680 by the Cre recombinase of bacteriophage P1. *Proc. Natl. Acad. Sci. USA* **85**, 5166–5170.
- 681 **Scherer, M., Heimel, K., Starke, V. and Kämper, J.** (2006) The Clp1 Protein Is Required  
682 for Clamp Formation and Pathogenic Development of *Ustilago maydis*. *Plant Cell* **18**,  
683 2388–2401.
- 684 **Schulz, B., Banuett, F., Dahl, M., Schlesinger, R., Schäfer, W., Martin, T., Herskowitz, I.**  
685 **and Kahmann, R.** (1990) The *b* alleles of *U. maydis*, whose combinations program  
686 pathogenic development, code for polypeptides containing a homeodomain-related  
687 motif. *Cell* **60**, 295–306.
- 688 **Schuster, M., Schweizer, G., Reissmann, S. and Kahmann, R.** (2016) Genome editing in  
689 *Ustilago maydis* using the CRISPR-Cas system. *Fungal Genet. Biol.* **89**, 3–9.
- 690 **Soyer, J.L., Ghalid, M. El, Glaser, N., Ollivier, B., Linglin, J., Grandaubert, J.,**  
691 **Balesdent, M.H., Connolly, L.R., Freitag, M., Rouxel, T. and Fudal, I.** (2014)  
692 Epigenetic Control of Effector Gene Expression in the Plant Pathogenic Fungus  
693 *Leptosphaeria maculans*. *PLoS Genet.* **10**, 1–19.

- 694 **Spellig, T., Bottin, A. and Kahmann, R.** (1996) Green fluorescent protein (GFP) as a new  
695 vital marker in the phytopathogenic fungus *Ustilago maydis*. *Mol. Gen. Genet.* **252**, 503–  
696 509.
- 697 **Sternberg, N. and Hamilton, D.** (1981) Bacteriophage P1 Site-specific Recombination I.  
698 Recombination Between loxP Sites. *J. Mol. Biol.* **4**, 467–486.
- 699 **Terfrüchte, M., Joehnk, B., Fajardo-Somera, R., Braus, G.H., Riquelme, M., Schipper,**  
700 **K. and Feldbrügge, M.** (2014) Establishing a versatile Golden Gate cloning system for  
701 genetic engineering in fungi. *Fungal Genet. Biol.* **62**, 1–10.
- 702 **Treutlein, M.** (2007) *Funktionelle Charakterisierung des Rum1-Proteins aus dem*  
703 *phytopathogenen Pilz Ustilago maydis*. Phillips-Universität Marburg.
- 704 **Tsukuda, T., Carleton, S., Fotheringham, S. and Holloman, W.K.** (1988) Isolation and  
705 characterization of an autonomously replicating sequence from *Ustilago maydis*. *Mol.*  
706 *Cell. Biol.* **8**, 3703–3709.
- 707 **Twaruschek, K., Spörhase, P., Michlmayr, H., Wiesenberger, G. and Adam, G.** (2018)  
708 New Plasmids for *Fusarium* Transformation Allowing Positive-Negative Selection and  
709 Efficient Cre-loxP Mediated Marker Recycling. *Front. Microbiol.* **9**, 1–14.
- 710 **Wahl, R., Zahiri, A. and Kämper, J.** (2010) The *Ustilago maydis* *b* mating type locus  
711 controls hyphal proliferation and expression of secreted virulence factors *in planta*. *Mol.*  
712 *Microbiol.* **75**, 208–220.
- 713 **Wittschieben, B., Otero, G., Bizemont, T. De, Fellows, J., Erdjument-Bromage, H.,**  
714 **Ohba, R., Li, Y., Allis, C.D., Tempst, P. and Svejstrup, J.Q.** (1999) A novel histone  
715 acetyltransferase is an integral subunit of elongating RNA polymerase II holoenzyme.  
716 *Mol. Cell* **4**, 123–128.
- 717 **Wittschieben, B., Fellows, J., Du, W., Stillman, D.J. and Svejstrup, J.Q.** (2000)  
718 Overlapping roles for the histone acetyltransferase activities of SAGA and Elongator *in*  
719 *vivo*. *EMBO J.* **19**, 3060–3068.

- 720 **Yi, M., Chi, M.-H., Khang, C.H., Park, S.-Y., Kang, S., Valent, B. and Lee, Y.-H.** (2009)  
721 The ER Chaperone LHS1 Is Involved in Asexual Development and Rice Infection by the  
722 Blast Fungus *Magnaporthe oryzae*. *Plant Cell* **21**, 681–695.
- 723 **Yoshida, H., Oku, M., Suzuki, M. and Mori, K.** (2006) pXBP1(U) encoded in XBP1 pre-  
724 mRNA negatively regulates unfolded protein response activator pXBP1(S) in  
725 mammalian ER stress response. *J. Cell Biol.* **172**, 565–575.
- 726 **Zarnack, K., Eichhorn, H., Kahmann, R. and Feldbrügge, M.** (2008) Pheromone-  
727 regulated target genes respond differentially to MAPK phosphorylation of transcription  
728 factor Prf1. *Mol. Microbiol.* **69**, 1041–1053.
- 729 **Zhang, D.-X., Lu, H.-L., Liao, X., Leger, R.J.S. and Nuss, D.L.** (2013) Simple and  
730 efficient recycling of fungal selectable marker genes with the Cre-*loxP* recombination  
731 system via anastomosis. *Fungal Genet. Biol.* **61**, 1–8.

732

733

734

735

736 **Data availability statement:**

737 The data that support the findings of this study are available from the corresponding author  
738 upon reasonable request.

739

740

741 **Supporting Information Legends**

742

743 **Supplemental Figure 1: Strategy for strain generation for conditional gene expression.**

744 1) The gene of interest (GOI) is deleted from its native genomic locus. 2) The GOI is  
745 integrated into the genomic locus of the conditionally expressed gene, thereby replacing the  
746 native gene. 3) The resistance marker (here: Nat<sup>R</sup>) is removed using the FLP/FRT  
747 recombination system.

748

749 **Supplemental Figure 2:  $\Delta$ UMAG<sub>12184</sub> and  $\Delta$ UMAG<sub>03597</sub> strains do not show**  
750 **increased sensitivity to cell wall- or ER-stresses.**

751 Cell wall and ER-stress assays, and tests for filamentous growth of strains SG200,  
752 SG200 $\Delta$ *cib1*, SG200 $\Delta$ UMAG<sub>12184</sub> and SG200 $\Delta$ UMAG<sub>03597</sub>. Serial 10-fold dilutions  
753 were spotted on YNBG solid media supplemented with Congo Red (100  $\mu$ g/ml) or Calcofluor  
754 White (50  $\mu$ M) to induce cell wall stress, and on YNBG solid media supplemented with TM  
755 (1.0  $\mu$ g/ml) or DTT (1 mM) to induce ER-stress. Cells were spotted on PD-CC solid media to  
756 induce filamentous growth. Pictures were taken after 48 hours of incubation at 28 °C.

757

758 **Supplemental Table 1: Strains used in this study**

759 **Supplemental Table 2: Primers used in this study**

760 **Supplemental Table 3: Plasmid used in this study**

761



762 **Figure legends**

763

764 **Figure 1 The locus of integration and presence of a resistance cassette influence**

765 **promoter activity. (A)** Plant infection assay with the solopathogenic strain SG200 and a

766 derivative expression strain. Strains SG200 and SG200  $P_{mig2\_1}:cib1^s$  (*ip* locus) were inoculated

767 into 8 day-old maize seedlings. Disease symptoms were rated 8 dpi and grouped into

768 categories as shown in the figure legend. n = number of inoculated plants. Significance was

769 calculated using the Mann-Whitney-test. \*\*\*P < 0.001 **(B)** Analysis of *b*-dependent filament

770 formation on PD-CC solid media and on the leaf surface. Strains SG200 and

771 SG200 $P_{mig2\_1}:cib1^s$  (*ip* locus) were spotted on PD-CC solid media. Photographs were taken

772 after 24 hours at 28°C. White fuzzy colonies indicate the formation of filaments. Fungal

773 hyphae were stained 24 hours after inoculation with calcofluor to visualize the cells. Scale bar

774 =10  $\mu$ m. **(C)** qRT-PCR analysis of *cib1<sup>s</sup>* gene expression when integrated in different loci and

775 after removal of the resistance cassette. Primers specifically detecting the spliced *cib1*

776 transcript were used. RNA was isolated from exponentially growing *U. maydis* strains SG200,

777 SG200  $P_{mig2\_1}:cib1^s$  (*ip* locus integration), FB1 $\Delta cib1\Delta mig2\_1::Pcib1^s$  (*mig2\_1* locus, +Nat<sup>R</sup>)

778 and FB1 $\Delta cib1\Delta mig2\_1::cib1^s$  (*mig2\_1* locus, -Nat<sup>R</sup>). *eIF2b* was used for normalization.

779 Expression values represent the mean of three biological replicates with two technical

780 duplicates each. Error bars represent the SEM. Statistical significance was calculated using

781 the students *t* test. \*P value < 0.05, \*\*P < 0.01, and \*\*\*P < 0.001. **(D)** qRT-PCR analysis of

782 *pit1* and *pit2* gene expression when integrated in different loci and after removal of the

783 resistance cassette. RNA was isolated from exponentially growing *U. maydis* strains SG200,

784 SG200  $P_{pit1/2}:pit2/1$  (*ip* locus integration), SG200  $P_{pit1/2}:pit2/1$  (*pit2/1* locus, +Nat<sup>R</sup>), SG200

785  $P_{pit1/2}:pit2/1$  (*pit2/1* locus, +Hyg<sup>R</sup>) and  $P_{pit1/2}:pit2/1$  (*pit2/1* locus, -Hyg<sup>R</sup>). *eIF2b* was used for

786 normalization. Expression values represent the mean of three biological replicates with two

787 technical duplicates each. Error bars represent the SEM. Statistical significance was

788 calculated using the students *t* test. \*P value < 0.05, \*\*P < 0.01, and \*\*\*P < 0.001.

789

790 **Figure 2 Overexpression of *cib1<sup>s</sup>* in *planta* does not affect pathogenicity of *U. maydis*.**

791 **(A)** ER stress assay of strains FB1, FB1 $\Delta$ *cib1*, FB1 $\Delta$ *cib1*  $\Delta$ *mig1::cib1<sup>s</sup>* and FB1 $\Delta$ *cib1*  
792  $\Delta$ *mig2\_1::cib1<sup>s</sup>*. Serial 10-fold dilutions were spotted on YNBG solid medium supplemented  
793 with TM (1.0  $\mu$ g/ml) or DTT (1 mM). Pictures were taken after 48 hours of incubation at 28  
794 °C. **(B)** Mating assay with compatible mixtures of FB1, FB2, FB1 $\Delta$ *cib1*, FB2 $\Delta$ *cib1*,  
795 FB1 $\Delta$ *cib1*  $\Delta$ *mig1::cib1<sup>s</sup>* and FB1 $\Delta$ *cib1*  $\Delta$ *mig2\_1::cib1<sup>s</sup>*. Mixtures were spotted on PD-CC  
796 solid media as shown in the figure. Photographs were taken after 24 hours at 28°C. White  
797 fuzzy colonies indicate the formation of filaments. **(C)** Plant infection assay with compatible  
798 mixtures of FB1 and FB2, FB1 $\Delta$ *cib1*, FB2 $\Delta$ *cib1*, FB1 $\Delta$ *cib1* $\Delta$ *mig1::cib1<sup>s</sup>* and FB1 $\Delta$ *cib1*  
799  $\Delta$ *mig2\_1::cib1<sup>s</sup>*. 8 day-old maize seedlings were co-inoculated with the indicated strain  
800 mixtures. Disease symptoms were rated 8 dpi and grouped into categories as shown in the  
801 figure legend. n = number of inoculated plants. Pictures of leaves were taken at 8 dpi and  
802 represent the most common infection symptom. Significance was calculated using the  
803 Mann-Whitney-test. \*\*\*P < 0.001.

804

805 **Figure 3 Identification and testing of promoters for conditional gene expression.**

806 **(A)** Fragments Per Kilobase Million (FPKMs) of the *UMAG\_12184* and *UMAG\_03597*  
807 genes up to 8 days post inoculation (dpi). 6 day-old maize seedlings were injected with a  
808 mixture of compatible haploid strains FB1 and FB2 and plant material was harvested at the  
809 indicated time points. Raw data was extracted from Lanver *et al.*, 2018. **(B)** Plant infection  
810 assay with the solopathogenic strain SG200 and derivatives. SG200, SG200 $\Delta$ *UMAG\_12184*  
811 and SG200 $\Delta$ *UMAG\_03597* were inoculated into 8 day-old maize seedlings. Disease  
812 symptoms were rated 8 days after inoculation (dpi) and grouped into categories as shown in  
813 the figure legend. n = number of inoculated plants. Significance was calculated using the  
814 Mann-Whitney-test.

815

816 **Figure 4 Conditional *cib1* expression restores ER-stress resistance, but not**  
817 **pathogenicity.**

818 **(A)** ER stress assay of strains FB2 (WT), FB2 $\Delta$ *cib1*, and derivatives. Serial 10-fold dilutions  
819 were spotted on YNBG solid medium supplemented with TM (1.0  $\mu$ g/ml) or DTT (1.0 mM).  
820 Pictures were taken after 48 hours of incubation at 28 °C. **(B)** Mating assay with FB1,  
821 FB1 $\Delta$ *cib1* and FB2 $\Delta$ *cib1*  $\Delta$ UMAG\_12184::*cib1* and FB2 $\Delta$ *cib1*  $\Delta$ UMAG\_03597::*cib1*.  
822 Compatible mixtures of strains were spotted on potato dextrose solid media supplemented  
823 with 1% charcoal (PD-CC). Photographs were taken after 24 hours at 28°C. White fuzzy  
824 colonies indicate the formation of filaments. **(C)** Plant infection assay with FB1 and FB2,  
825 FB1 $\Delta$ *cib1* and FB2, FB2 $\Delta$ *cib1*  $\Delta$ UMAG\_12184::*cib1* and FB2 $\Delta$ *cib1*  $\Delta$ UMAG\_03597::*cib1*. 8  
826 day-old maize seedlings were co-inoculated with compatible strain mixtures as indicated in  
827 the figure. Disease symptoms were rated 8 dpi and grouped into categories as shown in the  
828 figure legend. n = number of inoculated plants. Pictures of leaves were taken at 8 dpi and  
829 represent the most common infection symptom. Significance was calculated using the  
830 Mann-Whitney-test. \*\*\*P < 0.001

831

832 **Figure 5 Analysis of fungal morphology and plant defense response of conditional *cib1***  
833 **mutant strains.**

834 **(A)** Fungal proliferation of compatible mixtures of FB1 and FB2, FB1 $\Delta$ *cib1* and FB2,  
835 FB2 $\Delta$ *cib1*  $\Delta$ UMAG\_12184::*cib1* or FB2 $\Delta$ *cib1*  $\Delta$ UMAG\_03597::*cib1* investigated by Chlorazol  
836 Black E staining of infected leaf samples at 2, 4 and 6 dpi. Arrows point to clamp cells  
837 indicative of fungal proliferation *in planta*. Scale bar = 20  $\mu$ m. **(B)** qRT-PCR analysis of *PR1*,  
838 *PR3* and *PR5* gene expression of infected maize leaves at 2, 4 and 6 dpi. Maize seedlings  
839 were inoculated with the indicated strains. *GAPDH* was used for normalization. Expression  
840 values represent the mean of two or three biological replicates with two technical duplicates

841 each. Error bars represent the SEM. Statistical significance was calculated using the students *t*

842 test. \*P value < 0.05.

843

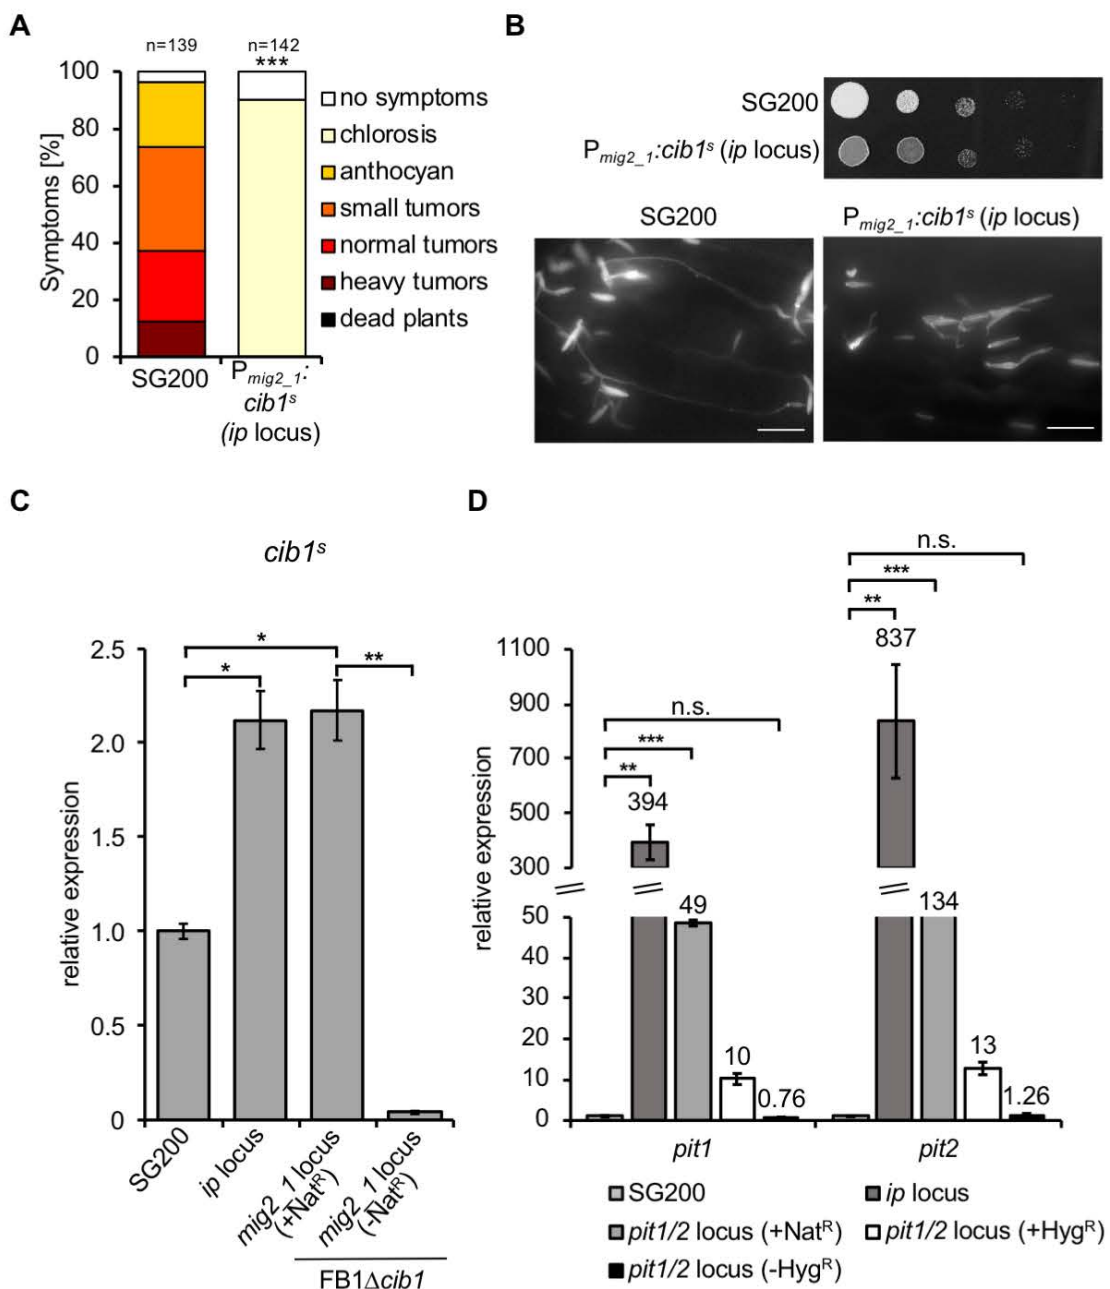

**Figure 1 The locus of integration and presence of a resistance cassette influence promoter activity. (A)** Plant infection assay with the solopathogenic strain SG200 and a derivative expression strain. Strains SG200 and SG200  $P_{mig2\_1}::cib1^s$  (*ip* locus) were inoculated into 8 day-old maize seedlings. Disease symptoms were rated 8 dpi and grouped into categories as shown in the figure legend.  $n$  = number of inoculated plants. **(B)** Analysis of *b*-dependent filament formation on PD-CC solid media and on the leaf surface. Strains SG200 and SG200  $P_{mig2\_1}::cib1^s$  (*ip* locus) were spotted on PD-CC solid media. Photographs were taken after 24 hours at 28°C. White fuzzy colonies indicate the formation of filaments. Fungal hyphae were stained 24 hours after inoculation with calcofluor to visualize the cells. Scale bar = 10  $\mu$ m. **(C)** qRT-PCR analysis of *cib1<sup>s</sup>* gene expression when integrated in different loci and after removal of the resistance cassette. Primers specifically detecting the spliced *cib1* transcript were used. RNA was isolated from exponentially growing *U. maydis* strains SG200, SG200  $P_{mig2\_1}::cib1^s$  (*ip* locus integration),  $FB1\Delta cib1\Delta mig2\_1::Pcib1^s$  (*mig2\_1* locus, +Nat<sup>R</sup>) and  $FB1\Delta cib1\Delta mig2\_1::cib1^s$  (*mig2\_1* locus, -Nat<sup>R</sup>). *eIF2b* was used for normalization. Expression values represent the mean of three biological replicates with two technical duplicates each. Error bars represent the SEM. Statistical significance was calculated using the students *t* test. \*P value < 0.05, \*\*P < 0.01, and \*\*\*P < 0.001. **(D)** qRT-PCR analysis of *pit1* and *pit2* gene expression when integrated in different loci and after removal of the resistance cassette. RNA was isolated from exponentially growing *U. maydis* strains SG200, SG200  $P_{pit1/2}::pit2/1$  (*ip* locus integration), SG200  $P_{pit1/2}::pit2/1$  (*pit2/1* locus, +Nat<sup>R</sup>), SG200  $P_{pit1/2}::pit2/1$  (*pit2/1* locus, +Hyg<sup>R</sup>) and  $P_{pit1/2}::pit2/1$  (*pit2/1* locus, -Hyg<sup>R</sup>). *eIF2b* was used for normalization. Expression values represent the mean of three biological replicates with two technical duplicates each. Error bars represent the SEM. Statistical significance was calculated using the students *t* test. \*P value < 0.05, \*\*P < 0.01, and \*\*\*P < 0.001.

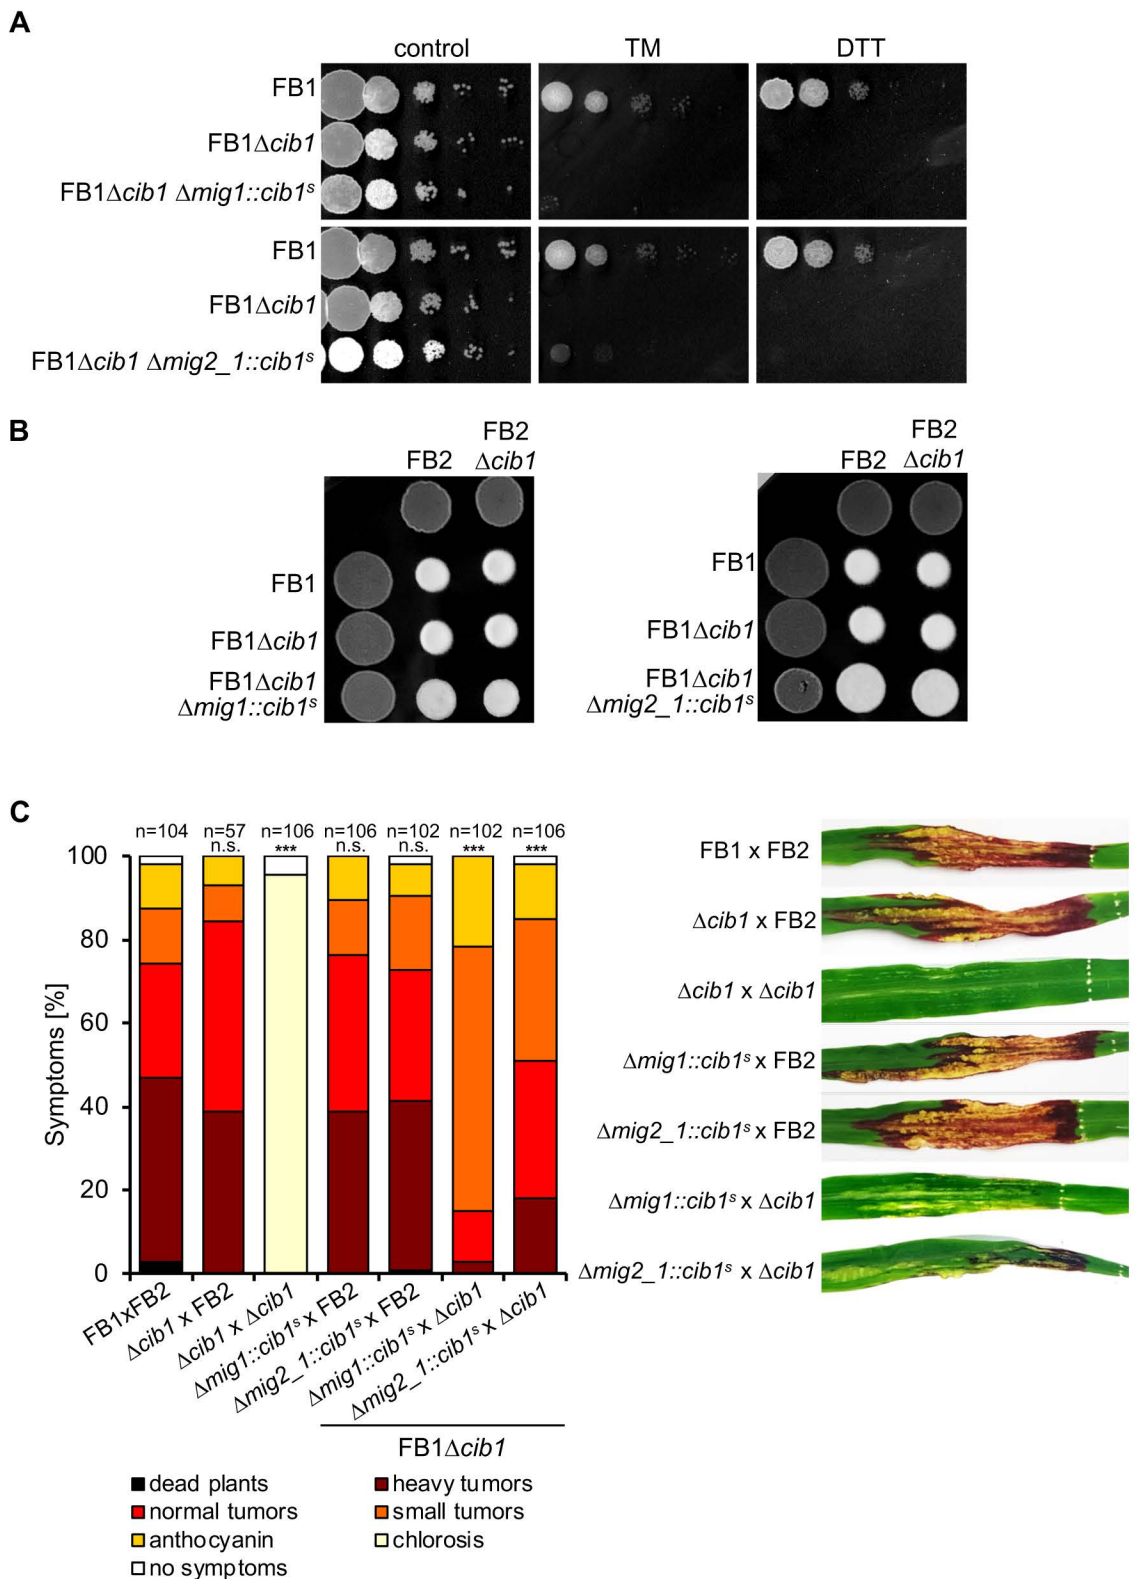

**Figure 2 Overexpression of *cib1*<sup>s</sup> in planta does not affect pathogenicity of *U. maydis*.** (A) ER stress assay of strains FB1, FB1 $\Delta$ *cib1*, FB1 $\Delta$ *cib1*  $\Delta$ *mig1::cib1*<sup>s</sup> and FB1 $\Delta$ *cib1*  $\Delta$ *mig2\_1::cib1*<sup>s</sup>. Serial 10-fold dilutions were spotted on YNBG solid medium supplemented with TM (1.0  $\mu$ g/ml) or DTT (1 mM). Pictures were taken after 48 hours of incubation at 28 °C. (B) Mating assay with compatible mixtures of FB1, FB2, FB1 $\Delta$ *cib1*, FB2 $\Delta$ *cib1*, FB1 $\Delta$ *cib1*  $\Delta$ *mig1::cib1*<sup>s</sup> and FB1 $\Delta$ *cib1*  $\Delta$ *mig2\_1::cib1*<sup>s</sup>. Mixtures were spotted on PD-CC solid media as shown in the figure. Photographs were taken after 24 hours at 28°C. White fuzzy colonies indicate the formation of filaments. (C) Plant infection assay with compatible mixtures of FB1 and FB2, FB1 $\Delta$ *cib1*, FB2 $\Delta$ *cib1*, FB1 $\Delta$ *cib1*  $\Delta$ *mig1::cib1*<sup>s</sup> and FB1 $\Delta$ *cib1*  $\Delta$ *mig2\_1::cib1*<sup>s</sup>. 8 day-old maize seedlings were co-inoculated with the indicated strain mixtures. Disease symptoms were rated 8 dpi and grouped into categories as shown in the figure legend. n = number of inoculated plants. Pictures of leaves were taken at 8 dpi and represent the most common infection symptom. Significance was calculated using the Mann-Whitney-test. \*\*\*P < 0.001.

**A**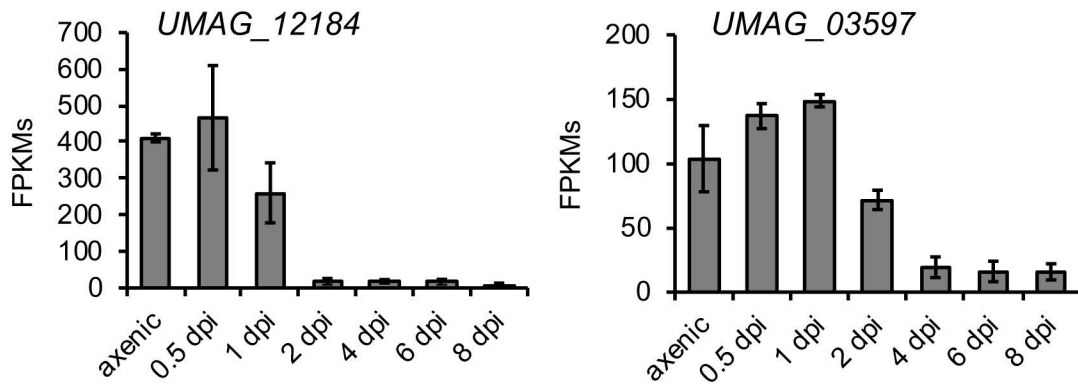**B**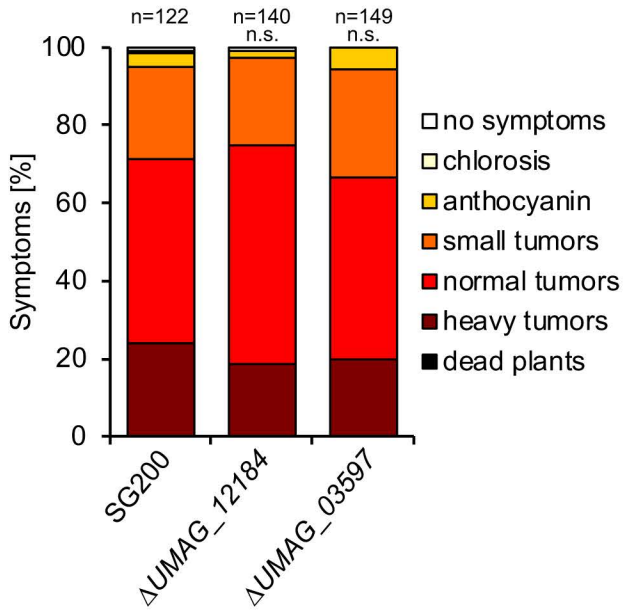

**Figure 3 Identification and testing of promoters for conditional gene expression.**

**(A)** Fragments Per Kilobase Million (FPKMs) of the *UMG\_12184* and *UMG\_03597* genes up to 8 days post inoculation (dpi). 6 day-old maize seedlings were injected with a mixture of compatible haploid strains FB1 and FB2 and plant material was harvested at the indicated time points. Raw data was extracted from Lanver *et al.*, 2018. **(B)** Plant infection assay with the solopathogenic strain SG200 and derivatives. SG200, SG200 $\Delta$ UMG\_12184 and SG200 $\Delta$ UMG\_03597 were inoculated into 8 day-old maize seedlings. Disease symptoms were rated 8 days after inoculation (dpi) and grouped into categories as shown in the figure legend. n = number of inoculated plants. Significance was calculated using the Mann-Whitney-test.

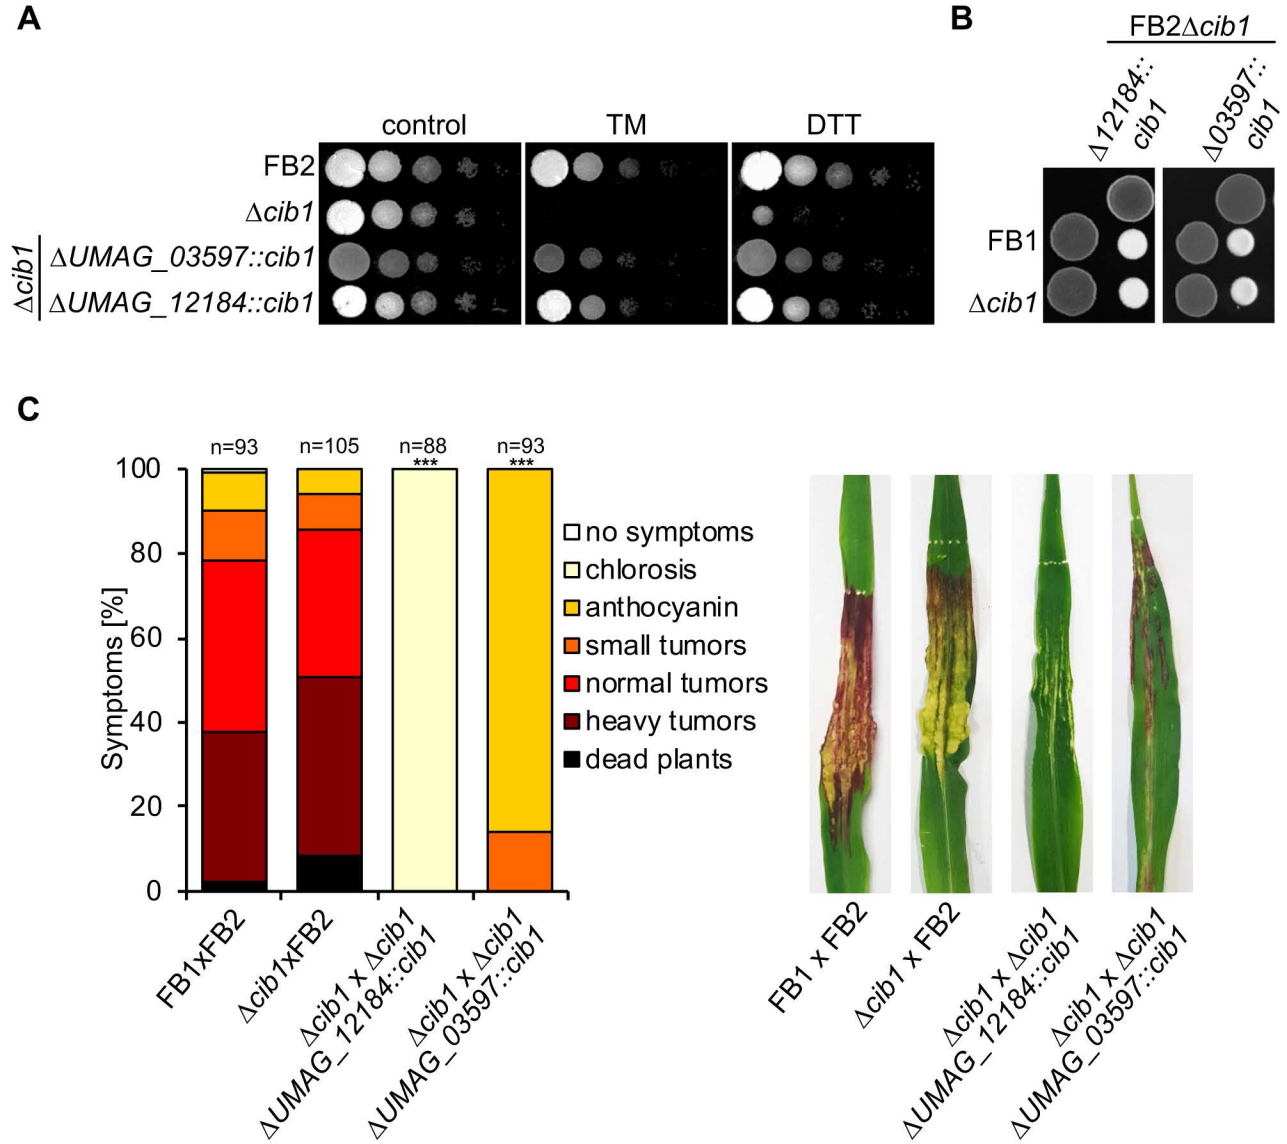

**Figure 4 Conditional *cib1* expression restores ER-stress resistance, but not pathogenicity.**

(A) ER stress assay of strains FB2 (WT), FB2 $\Delta cib1$ , and derivatives. Serial 10-fold dilutions were spotted on YNBG solid medium supplemented with TM (1.0  $\mu$ g/ml) or DTT (1.0 mM). Pictures were taken after 48 hours of incubation at 28 °C. (B) Mating assay with FB1, FB1 $\Delta cib1$  and FB2 $\Delta cib1$   $\Delta UMAG_{12184}::cib1$  and FB2 $\Delta cib1$   $\Delta UMAG_{03597}::cib1$ . Compatible mixtures of strains were spotted on potato dextrose solid media supplemented with 1% charcoal (PD-CC). Photographs were taken after 24 hours at 28°C. White fuzzy colonies indicate the formation of filaments. (C) Plant infection assay with FB1 and FB2, FB1 $\Delta cib1$  and FB2, FB2 $\Delta cib1$   $\Delta UMAG_{12184}::cib1$  and FB2 $\Delta cib1$   $\Delta UMAG_{03597}::cib1$ . 8 day-old maize seedlings were co-inoculated with compatible strain mixtures as indicated in the figure. Disease symptoms were rated 8 dpi and grouped into categories as shown in the figure legend. n = number of inoculated plants. Pictures of leaves were taken at 8 dpi and represent the most common infection symptom. Significance was calculated using the Mann-Whitney-test. \*\*\*P < 0.001



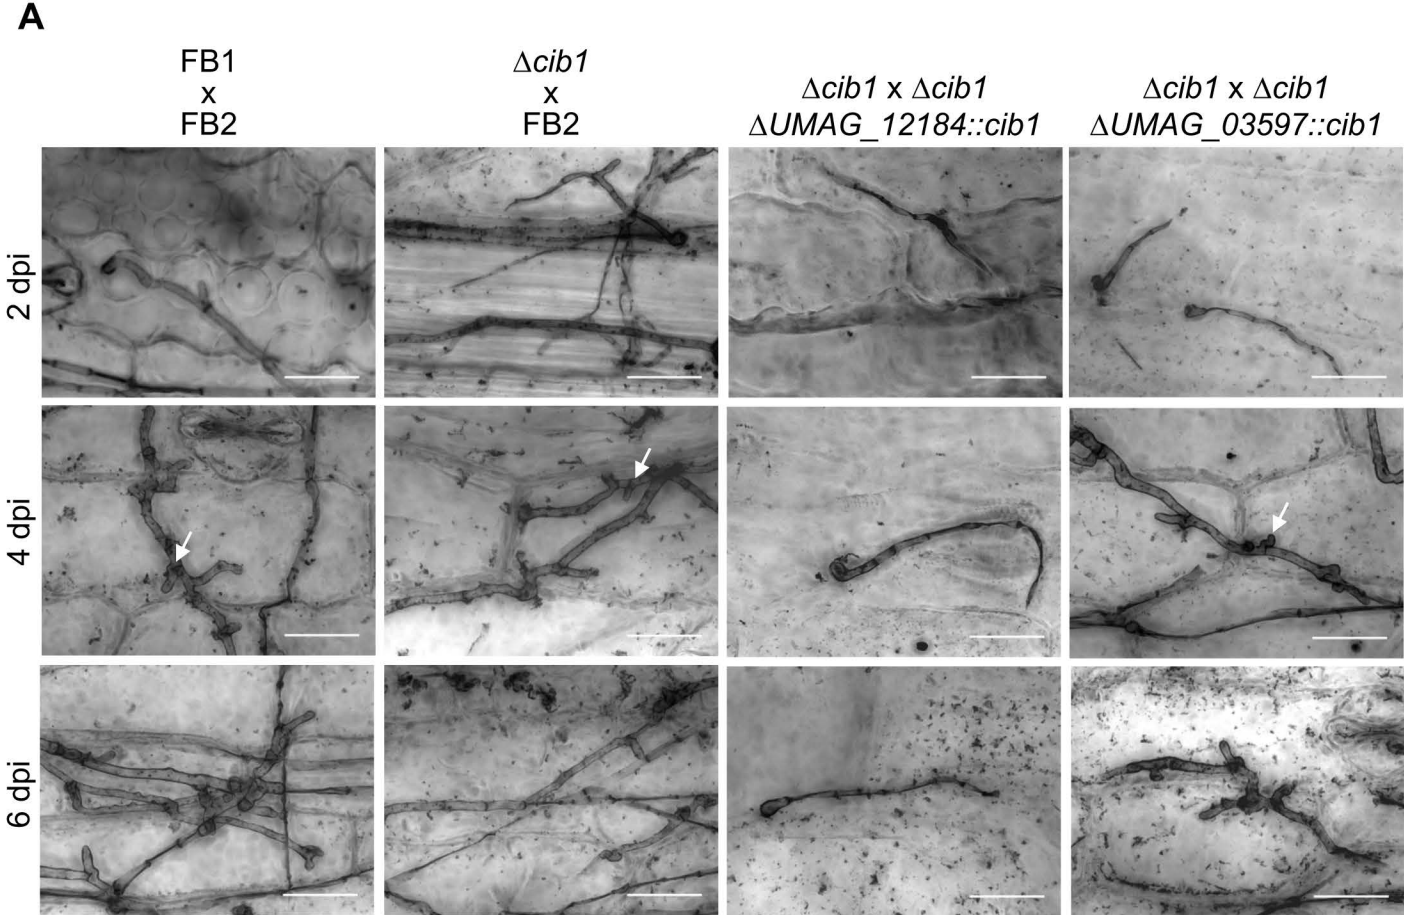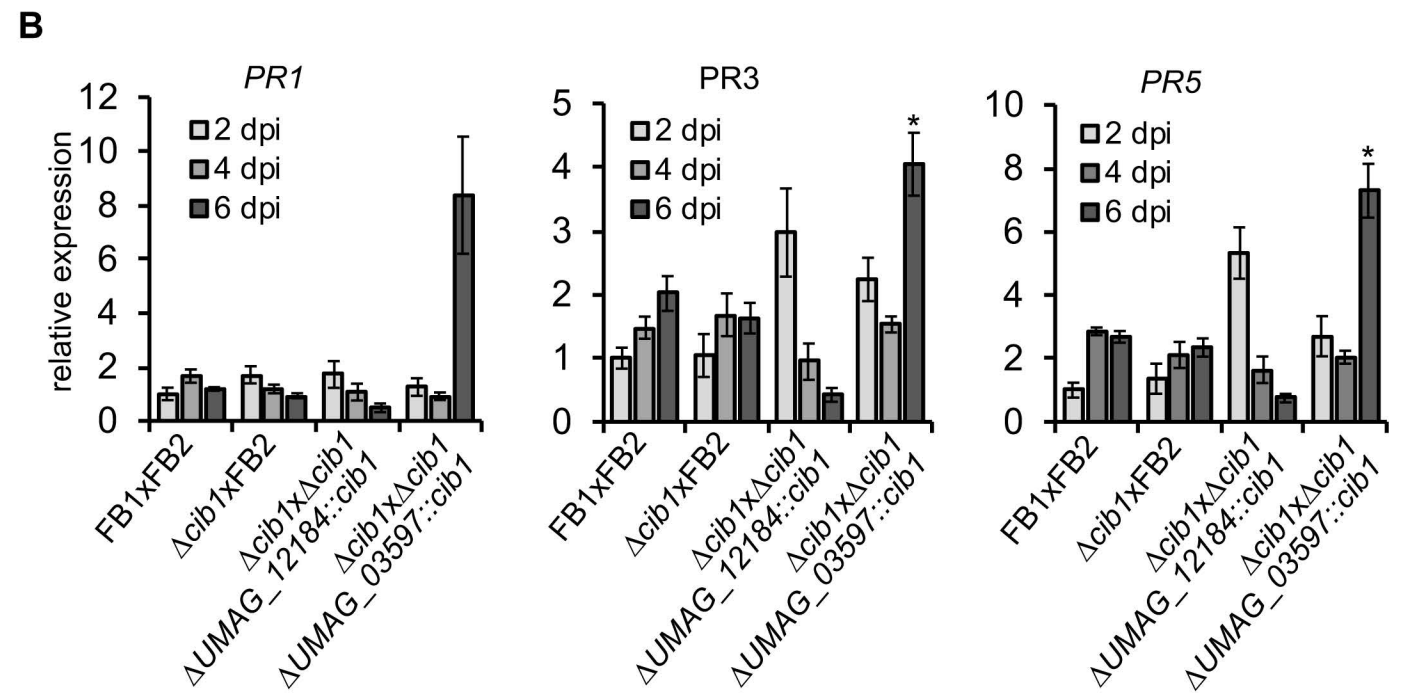

**Figure 5 Analysis of fungal morphology and plant defense response of conditional *cib1* mutant strains.**

**(A)** Fungal proliferation of compatible mixtures of FB1 and FB2, FB1 $\Delta cib1$  and FB2, FB2 $\Delta cib1$   $\Delta U MAG_{12184}::cib1$  or FB2 $\Delta cib1$   $\Delta U MAG_{03597}::cib1$  investigated by Chlorazol Black E staining of infected leaf samples at 2, 4 and 6 dpi. Arrows point to clamp cells indicative of fungal proliferation *in planta*. Scale bar = 20  $\mu m$ . **(B)** qRT-PCR analysis of *PR1*, *PR3* and *PR5* gene expression of infected maize leaves at 2, 4 and 6 dpi. Maize seedlings were inoculated with the indicated strains. *GAPDH* was used for normalization. Expression values represent the mean of two or three biological replicates with two technical duplicates each. Error bars represent the SEM. Statistical significance was calculated using the students *t* test. \*P value < 0.05.
